# Supplementary material for: Synthesis of diarylidenecyclohexanone derivatives as potential anti-inflammatory leads against COX-2/mPGES1 and 5-LOX
Source: Royal Society of Chemistry journal article supplement (doi:10.1039/c9nj00726a), 2019-01-01
Supplement: c9nj00726a1.pdf [file c9nj00726a1.pdf]

# Synthesis, characterization of Diarylidencyclohexanone derivatives as new anti-inflammatory pharmacophores exhibiting strong PGE2 and 5-LOX inhibition

Swayamsiddha Kar<sup>a</sup>, GayathriRamamoorthy<sup>b</sup>, ShwetaSinha<sup>b</sup>, Meera Ramanan<sup>b</sup>, Jeevan Kumar Pola<sup>a</sup>, NageswaraRaoGolakoti<sup>a#</sup>, JagadeeshBabuNanubolu<sup>c</sup>, Sai Suraj Kumar Sahoo<sup>a</sup>, Rajesh BabuD<sup>a</sup>, MukeshDoble<sup>b#</sup>

<sup>a</sup>Department of chemistry, Sri SathyaSai Institute of Higher Learning, Puttaparthi, Andhra Pradesh, India.

<sup>b</sup>Bioengineering and Drug Design Lab, Department of Biotechnology, Bhupat and Jyoti Mehta School of Biosciences, Indian Institute of Technology, Madras, Tamil Nadu, India.

<sup>c</sup>Indian Institute of Chemical Technology (IICT), Hyderabad, India.

<sup>#</sup>Corresponding authors:

Prof. G. NageswaraRao (Email id: [gnageswararao@sssihl.edu.in](mailto:gnageswararao@sssihl.edu.in))

Prof. MukeshDoble (Email id: [mukeshd@iitm.ac.in](mailto:mukeshd@iitm.ac.in))

## 1. Instrumentation

The melting points (MP) were determined using an open capillary apparatus and are uncorrected. Thermo-Nicolet Avatar 370 spectrophotometer was employed for recording FT-IR using KBr pellets. The Shimadzu 2450 spectrophotometer was used for recording the UV-Vis spectra of the compounds in methanol between wavelength of 200 nm to 500 nm. VARIAN 400 MHz for the <sup>1</sup>H-NMR spectra and VARIAN 100 MHz for the <sup>13</sup>C-NMR spectra were employed using the internal standard TMS and the solvent CDCl<sub>3</sub>. Mass spectra was obtained using AGILENT 6430 Triple Quad LC/MS and in cases of **Ib** and **IVa** SHIMADZU 2010 PLUS GC/MS. The spectral data of the synthesized compounds have been provided below in section 3.

## 2. Synthesis of various Diarylidencyclohexanones

The diarylidencyclohexanones were synthesized via the Claisen-Schmidt condensation reaction<sup>1</sup>. The procedure in brief: in a round bottom flask ethanol (50ml) and aqueous NaOH (10%, 50ml) were taken. A mixture of the corresponding aryl aldehyde (0.05 mol) and cyclohexanone (0.025 mol) was prepared separately and one half of the aldehyde-ketone mixture was added to the EtOH - aq. NaOH solution with continuous stirring at room temperature. After 15 minutes, the remaining half of the aldehyde-ketone mixture was added to the round bottomed flask. The stirring of the

mixture was continued till the completion (checked by TLC). After completion, the contents of the round bottomed flask were filtered and then washed thoroughly with ice-cold water to remove any alkali present. The solid obtained thus was dried and was recrystallized.

### 3. The spectral data of compounds:

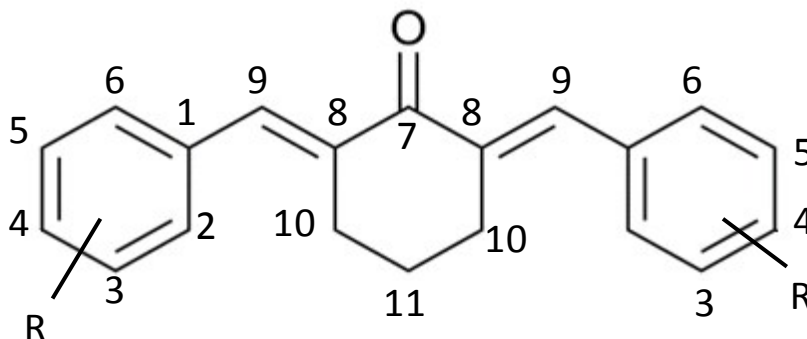

#### 3.1 Ia) 2,6-Bis(dibenzylidene)cyclohexanone:

Yield: 80 %. Light yellow solid. M.P: 116.2<sup>o</sup>C. <sup>1</sup>H NMR:  $\delta$  7.81 (H-9, s, 2H),  $\delta$  7.47 (H-6 and H-2, d, 4H, J=7.8Hz),  $\delta$  7.41 (H-5 and H-3, d, 4H, J=7.8Hz),  $\delta$  7.34 (H-4, t, 2H, J=7.8Hz),  $\delta$  2.94 (H-10, t, 4H, J=7Hz), and  $\delta$  1.79 (H-11, quintet, 2H, J=7Hz). <sup>13</sup>C NMR:  $\delta$  190.40 (C-7),  $\delta$  136.95 (C-9),  $\delta$  136.18 (C-8),  $\delta$  130.39 (C-6 and C-2),  $\delta$  128.60 (C-4),  $\delta$  128.39 (C-5 and C-3),  $\delta$  28.48 (C-10, 2C), and  $\delta$  23.02 (C-11, 1C). IR (KBr, cm<sup>-1</sup>): 3059 (Ar C-H stretch), 2905 (C-H stretch), 1660 (C=C stretch), 1606 (C=C stretch), 1572, 1554 (Ar skeletal bands), 1433 (C-H bend), 716, 694 (monosubstituted phenyl ring). MS (m/z): 275 [M + H]<sup>+</sup>; UV: (MeOH): 330 nm.

#### 3.2 Ib) 2,6-Bis(3-nitro-benzylidene)cyclohexanone:

Yield: 8.6%. Yellow solid, Recrystallized with MeOH/CHCl<sub>3</sub>. MP: 188-190<sup>o</sup>C. <sup>1</sup>H NMR:  $\delta$  8.31 (H-2, s, 2H),  $\delta$  8.21 (H-4, d, 2H, J=8Hz),  $\delta$  7.80 (H-9, s, 2H),  $\delta$  7.75 (d, 2H, H-6, J=8Hz),  $\delta$  7.61 (H-5, t, 2H, J=8Hz),  $\delta$  2.99 (H-10, t, 4H, J=7Hz), and  $\delta$  1.86 (H-11, m, 2H, J=7Hz). <sup>13</sup>C NMR:  $\delta$  189.21 (C=O),  $\delta$  148.28 (C-3, -NO<sub>2</sub>),  $\delta$  138.01 (C-9),  $\delta$  137.3 (C-1),  $\delta$  136.19 (C-8),  $\delta$  134.68 (C-2),  $\delta$  129.56 (C-4),  $\delta$  124.46 (C-6),  $\delta$  123.32 (C-5),  $\delta$  28.26 (C-10), and  $\delta$  22.57 (C-11). IR (KBr, cm<sup>-1</sup>): 1664 (C=C stretch), 1604 (C=C stretch), 1573 (Ar C=C), 1521, 1325 (asymmetric and symmetric -NO<sub>2</sub> stretch), 808, 721, 678 (m-disubstituted benzene ring), 678, 621 (C-H oop). MS (m/z): 364 [M]<sup>+</sup>; UV: (MeOH): 224, 313 nm.

#### 3.3 Ic) 2,6-Bis(2-chlorobenzylidene)cyclohexanone:

Yield: 71%. Yellow flaky crystals. M.P: 120-121<sup>o</sup>C. <sup>1</sup>H NMR:  $\delta$  7.92 (H-9, s, 2H),  $\delta$  7.44 (H-5, t, 2H, J=7.4Hz),  $\delta$  7.34 (H-6, d, 2H, J=7.4Hz),  $\delta$  7.28 (H-4 and H-3, multiplet, 4H),  $\delta$  2.80 (H-10, t, 4H, J=6.4Hz), and  $\delta$  1.78 (H-11, quintet, 2H, J=6.4Hz). <sup>13</sup>C NMR:  $\delta$  189.76 (C=O),  $\delta$  137.73 (C-8),  $\delta$  135.03 (C-2),  $\delta$  135.02 (C-9),  $\delta$  134.38 (C-1),  $\delta$  130.52 (C-4),  $\delta$  129.75 (C-6),  $\delta$  129.52 (C-5),  $\delta$  126.26 (C-3),  $\delta$  28.40 (C-10), and  $\delta$  23.17 (C-11). IR (KBr, cm<sup>-1</sup>): 3064 (Ar C-H stretch), 2971 cm<sup>-1</sup>

<sup>1</sup>, 2941 cm<sup>-1</sup>, 2917 cm<sup>-1</sup> (sp<sup>3</sup> C-H stretch) 1663( ), 1601 (C=C stretch), 1586, 1575, 1468 (Ar C=C stretch), 1052 (C-Cl stretch), 753 (ortho di-substituted benzene ring). MS (*m/z*): 342.9 [M+H]<sup>+</sup>, 306.9 [M - Cl]<sup>+</sup>, 270.9 [M - 2 Cl]<sup>+</sup>; UV: (MeOH): 234, 313 nm.

### 3.4 Id) 2,6-Bis(3-chlorobenzylidene) cyclohexanone:

Yield: 78%. Bright Yellow needles. M.P.: 104-105°C. <sup>1</sup>H NMR: δ 7.71 (H-9, s, 2H), δ 7.43 (H-2, s, 2H), δ 7.33 (H-4, H-5 and H-6, multiplet, 6H), δ 2.90 (H-10, t, 4H, J=6.9 Hz), and δ 1.81 (H-11, quintet, 2H, J=6.9 Hz). <sup>13</sup>C NMR: δ 189.74 (C-7), δ 137.59 (C-3), δ 137.02 (C-8), δ 135.61 (C-9), δ 134.32 (C-1), δ 129.90 (C-2), δ 129.67 (C-4), δ 128.62 (C-5), δ 128.52 (C-6), δ 28.34 (C-10, 2C), and δ 22.76 (C-11, 1C). IR (KBr, cm<sup>-1</sup>): 3100 (Ar C-H stretch), 2941, 2866, 2842 (sp<sup>3</sup> C-H stretch) 1664( ), 1606 (C=C stretch), 1579, 1560, 1473 (Ar C=C stretch) 1066 (C-Cl stretch) 758 (meta di-substituted benzene ring). MS (*m/z*): 342.9 [M+H]<sup>+</sup>, 308.9 [M-Cl]<sup>+</sup>, 272 [M-2Cl]<sup>+</sup>; UV: (MeOH): 234, 323 nm.

### 3.5 Ie) 2,6-Bis(4-chlorobenzylidene) cyclohexanone:

Yield: 35.58%. Bright yellow solid, Recrystallized with EtOH. M.P.: 144-146°C. <sup>1</sup>H NMR: δ 7.63 (H-9, s, 2H), δ 7.29 (H-2, H-6, d, 4H, J=7.4 Hz), δ 7.27 (H-3, H-5, d, 4H, J=7.4 Hz), δ 2.80 (H-10, t, 4H, J=6.8 Hz), and δ 1.72 (H-11, quintet, 2H, J=6.8 Hz). <sup>13</sup>C NMR: δ 190.44 (C-7), δ 137.15 (C-4), δ 136.36 (C-9), δ 135.22 (C-1), δ 134.92 (C-8), δ 132.15 (C-3, C-5), δ 129.27 (C-2, C-6), 28.96 (C-10), and δ 23.11 (C-11). IR (KBr, cm<sup>-1</sup>): 1666( ), 1606 (C=C stretch), 1575 (Ar C=C stretch), 1091 (C-Cl), 837 (P-disubstituted benzene ring) 707, 632 (C-H oop). MS (*m/z*): 342.9 [M+H]<sup>+</sup>, 308.9 [M-Cl]<sup>+</sup>, 272 [M-2Cl]<sup>+</sup>; UV: (MeOH): 349, 240 nm.

### 3.6 If) 2,6-Bis(4-methoxybenzylidene) cyclohexanone:

Yield: 22.96%. Yellow needles, Recrystallized with EtOH. M.P.: 160-162°C. <sup>1</sup>H NMR: δ 7.76 (s, 2H, H-9), δ 7.45 (d, 4H, H-2, H-6, J=7.6 Hz), δ 6.93 (d, 4H, H-3, H-5, J=7.6 Hz), δ 3.84 (s, 6H, -OCH<sub>3</sub>), δ 2.92 (4H, t, H-10, J=6.5 Hz), and δ 1.81 (H-11, quintet, 2H, J=6.5 Hz). <sup>13</sup>C NMR: δ 190.81 (C=O), δ 160.52 (C-4), δ 137.1 (C-9), δ 134.96 (C-8), δ 132.82 (C-2, C-6), δ 129.37 (C-1), δ 114.50 (C-3, C-5), δ 59.93 (-OCH<sub>3</sub>), δ 29.12 (C-10), and δ 23.64 (C-11). IR (KBr, cm<sup>-1</sup>): 1658( ), 1593 (C=C stretch), 1556, 1508 (Ar C=C stretch), 1247 (Ar C-O stretch), 835 (P-disubstituted benzene ring), 663 (C-H, oop). MS (*m/z*): 335 [M+H]<sup>+</sup>, 214 [M - H<sub>3</sub>CO-C<sub>6</sub>H<sub>4</sub>-CH + H]<sup>+</sup>; UV: (MeOH): 240, 362 nm.

### 3.7 Ig) 2,6-Bis(4-iso-propylbenzylidene) cyclohexanone:

Yield: 26.50%. Yellow needles, Recrystallized with EtOH. M.P.: 142-144°C. <sup>1</sup>H NMR: δ 7.79 (s, 2H, H-9), δ 7.42 (d, 4H, H-2, H-6, J=8 Hz), δ 7.27 (d, 4H, H-3, H-5, J=8 Hz), δ 2.94 (m, 6H, H-10 and -CH<sub>2</sub>-(Me)<sub>2</sub>), and δ 1.27 (d, 12H, -CH<sub>2</sub>-2CH<sub>3</sub>, J=6 Hz). <sup>13</sup>C NMR: δ 190.45 (C=O), δ 136.92 (C-8), δ 135.52 (C-9), δ 133.62 (C-3 and C-5), δ 130.63 (C-1), δ 126.53 (C-2 and C-6), δ 34.05 (C-4), δ 28.57 (C-10), δ 23.87 (-CH<sub>2</sub>-(Me)<sub>2</sub>) and δ 23.08 (C-11). IR (KBr, cm<sup>-1</sup>): 1668( ), 1610 (C=C stretch), 1566, 1583 (Ar C=C

stretch) 970 (C-H bend), 825 (para di-substituted benzene ring), 731(C-H oop), 669. MS ( $m/z$ ):359 [M+H]<sup>+</sup>; UV: (MeOH):235, 339 nm.

### 3.8 Ih) 2,6-bis((E)-4-(dimethylamino)benzylidene)cyclohexanone:

Yield: 58%. Orange crystals. Recrystallized from MeOH. M.P:183-184.1<sup>o</sup>C.<sup>1</sup>H NMR:7.76(s, 2H, H-9), 7.45(d, 4H, J=8.8Hz, H-2, H-6), 6.72(d, 4H, J=8.8Hz, H-5, H-3), 3.02(s, 12H, -N(CH<sub>3</sub>)<sub>2</sub>), 2.93(t, 4H, J=5.6Hz, H-10), and 1.81(quintet, 2H, J=5.6Hz, H-11).<sup>13</sup>C NMR:δ 190.03(C=O), 150.32(C-4), 136.98 (C-9), 132.39 (C-1), 132.38(C-2 and C-6), 124.26 (C-8), 111.62(C-3 and C-5), 40.12(C-NMe<sub>2</sub>), 28.72(C-10) and 23.18 (C-11).IR(KBr, cm<sup>-1</sup>):3010 (sp<sup>3</sup>C-H stretch), 2922(asymmetric C-H), 1643(C=O), 1608(C=C stretch), 1577, 1518 (Ar skeletal bands), 1155 (sp<sup>3</sup> C-N stretch), 1355 (sp<sup>2</sup> C-N stretch), and 817(ArC-H(oop)). MS ( $m/z$ ):362 [M]<sup>+</sup>, 369; UV: (MeOH):282, 470nm

### 3.9 Ii) 2, 6-Bis(4-methylthiobenzylidene)cyclohexanone:

Yield: 46%. Yellow amorphous solid. Recrystallized from CHCl<sub>3</sub>. M.P:183-184.1<sup>o</sup>C.<sup>1</sup>H NMR:δ7.74 (s, H-8), δ7.41 (d,4H, J= 8Hz, H-2,H-6), δ 7.25 (d, 4H, J= 8Hz, H-3, H-5), δ2.92 (t,4H, J= 6 Hz, H-11), δ 2.51 (s,6H,S-CH<sub>3</sub>), and δ1.04(quintet, 2H, J= 6Hz, H-12).<sup>13</sup>C NMR:δ 190.023 (C=O), δ 139.89(2C, C-9), δ136.38(C-8), δ 135.49(2C, C-4), δ 130.87 (4C, C-2, C-6), δ 132.465(2C, C-1), δ 125.65(4C, C-3, C-5), δ 22.89 (1C, C-12), δ 28.51 (2C, C-11), δ 15.09(2C, C-7).IR(KBr, cm<sup>-1</sup>):3060(ArC-H stretch), 3050(olefinic C-H stretch), 2921 (SP<sup>3</sup>C-H stretch), 1659 (C=O), 1586,1492(ν<sub>Ar C=C</sub>), 1429(C-H bending), 817,96(ArC-Hoop). MS ( $m/z$ ):367 [M+H]<sup>+</sup>, 369 [M+2+H]<sup>+</sup>,338[M-C<sub>2</sub>H<sub>4</sub>]<sup>+</sup>, 338 [M-C=O]<sup>+</sup>; UV: (MeOH):258, 376nm

### 3.10 Ij) 2, 6-Bis-(cinnamylidene) cyclohexanone:

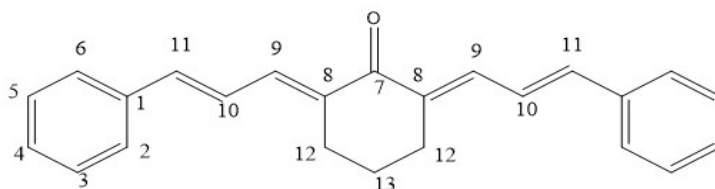

Yield: 96.5%.Orange-yellow solid, Recrystallized with MeOH . M.P:158-160<sup>o</sup>C.<sup>1</sup>H NMR:δ7.50(d,6H,H-9, H-6 and H-2, J=7.2Hz),δ7.37(t, 2H,H-4, J=7.2Hz), δ7.36(t, 4H,H-5 and H-3, J=7.2Hz),δ 7.07(t,2H, H-10),δ 6.97(d,2H,J=15.6Hz, H-11), δ 2.8(t, 4H,H-12, J=7Hz), and δ1.8(quintet, 2H,H-13, J=7Hz). <sup>13</sup>C NMR: δ188.89(C=O),δ140.78(2C,C-9), δ136.34(2C,C-11), δ135.38(2C,C-8),δ129.19(C-4),δ128.85(2C,C-2 and C-6), δ128.80(2C and C-3,C-5) δ123.68(2C,C-10), δ26.64(2C,C-12), and δ22.07(C-13). IR(KBr, cm<sup>-1</sup>): 3032 (Ar C-H stretch), 2935 (sp<sup>3</sup> C-H),

1652 ( ), 1610 (C=C stretch), 1581, 1552(Ar C=C stretch), 690,744(C-H, oop). MS:  $m/z$ : 327 [M+H]<sup>+</sup>, 236[M-C<sub>3</sub>H<sub>5</sub>-CH]<sup>+</sup>;UV: (MeOH): 272,388nm.

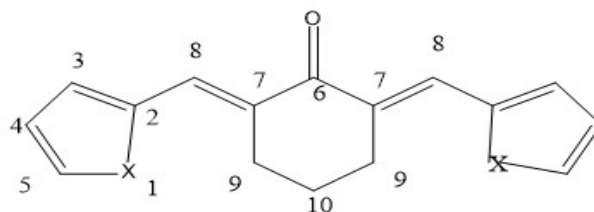

### 3.11 *Ia*) 2, 6-Bis-(2-furanylidene)cyclohexanone (X=O):

Yield: 31%. Yellow solid. Recrystallized with EtOH . M.P:138-140°C. <sup>1</sup>H NMR: δ7.55(d, 2H, H-5, J=3.5Hz), δ7.54(s, 2H,H-8), δ6.65(d, 2H, H-3, J=3Hz), δ6.50(dd, 2H, H-4, J=3.5Hz,3.0Hz),δ3.0(t, 4H, H-9, J=6.5Hz), andδ1.88(quintet, 2H, H-10, J=6.5Hz).<sup>13</sup>C NMR: δ189.06(C=O), δ152.79(C-2),δ144.54(C-5),δ133.03(C-7),δ123.38(C-8),δ116.10(C-3),δ112.34(C-4), δ27.99(C-9), and δ21.67(C-10). IR(KBr, cm<sup>-1</sup>):1643( ), 1593 (C=C stretch),1546 (Ar C=C stretch), 1471 (CH<sub>2</sub> bend), 1281(C–O–Casymmetric), 750, 657,613 (C-H oop ). MS ( $m/z$ ):254[M+H]<sup>+</sup>, 240[M-CH]<sup>+</sup>, 226 [M- 2CH<sub>2</sub>]<sup>+</sup>, 212 [M- 3CH<sub>2</sub>]<sup>+</sup>; UV: (MeOH): 246,377nm.

### 3.12 *Ib*) 2,6-Bis-(2-pyrrolylidene) cyclohexanone (X=NH):

Yield: 8.4%. Maroon flaky crystals. Recrystallized with EtOH . M.P:142-144°C. <sup>1</sup>H NMR: δ10.45(d(br), 2H, H-1), δ7.70(s, 2H,H-8), δ6.91(dd, 2H, H-5, J=3.5Hz,2.5Hz), δ6.54(d, 2H, H-3, J=3.5Hz), δ6.24(m, 2H, H-4), δ2.77(t, 4H, H-9, J=6.5Hz), and δ1.82(quintet, 2H, H-10, J=6.5Hz).<sup>13</sup>C NMR: δ189.1(C=O),δ130.6(C-2),δ129.6(C-8), δ126.3(C-7), δ121.58(C-5), δ117.73(C-3),δ110.4(C-4), δ28.42(C-9),and δ22.9(C-10). IR(KBr, cm<sup>-1</sup>): 3469 (N-H stretch), 1643( ),1591 (C=C stretch),1492(Ar C=C stretch), 742 , 663,619 (C-H oop ). MS ( $m/z$ ):253[M+H]<sup>+</sup>; UV: (MeOH): 250,418,436 nm.

### 3.13 *Ic*) 2,6-Bis-( 2-thienylidene) cyclohexanone(X=S):

Yield: 88.57%. Yellow solid. Recrystallized with EtOH . M.P:149-152°C. <sup>1</sup>H NMR:δ7.98(s, 2H,H-8), δ7.54(d, 2H, H-5, J=5.0Hz), δ7.38(d, 2H, H-3, J=3.5Hz), δ7.15(dd, 2H, H-4, J=5.0Hz, J=3.5Hz), δ2.98(t, 4H, H-9, J=6.5Hz), and δ1.87(quintet, 2H, H-10, J=6.5Hz).<sup>13</sup>C NMR: δ190.60(C=O),δ138.31(C-8), δ135.2(C-2), δ131.07(C-7), δ130.01(C-5), δ128.62(C-3),δ126.23(C-4), δ29.04(C-9), andδ22.34(C-10). IR(KBr, cm<sup>-1</sup>): 1649( ), 1587 (C=C stretch), 1548(Ar C=C stretch), 730, 633(C-H, oop), 617. MS ( $m/z$ ):287 [M+H]<sup>+</sup>, 288[M +2]<sup>+</sup> (sulphur),259, 175 and 123; UV: (MeOH): 255,374 nm.

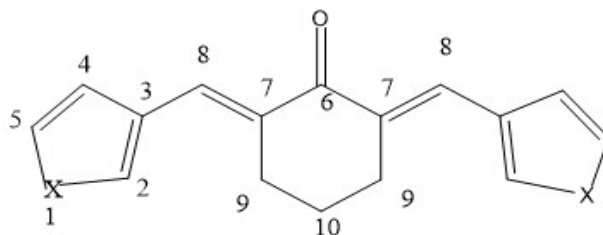

**3.14 IIIa) 2,6-Bis-( 3-thienylidene) cyclohexanone(X=S):**

Yield: 10%. Brownish yellow solid. Recrystallized with EtOH . M.P:142-144<sup>0</sup>C. <sup>1</sup>H NMR:δ7.76(s, 2H,H-8), δ7.51(d, 2H, H-2,J=2.5Hz), δ7.36(dd, 2H, H-5,J=5Hz,2.5Hz), δ7.29(dd, 2H, H-4, J=5Hz,1.5Hz),δ2.98(t, 4H, H-9,J=6.5Hz), andδ1.87(quintet, 2H, H-10 , J=6.5Hz).<sup>13</sup>C NMR: δ190.60(C=O),δ138.31(C-8), δ135.2(C-3),δ131.07(C-7),δ130.01(C-2), δ128.62(C-5), δ126.23(C-4), δ29.04(C-9), andδ22.34(C-10). IR(KBr, cm<sup>-1</sup>):1662( ), 1604 (C=C stretch), 1570, 1508 (Ar C=C stretch), 991, 856(C-H oop ), 788, 732 . MS (*m/z*):287 [M+H ]<sup>+</sup>, 288 [M +2] , 259, 175 and 123; UV: (MeOH): 312,345 nm.

**3.15 IVa) 2,6-Bis(pyridin-2-ylmethylene)cyclohexan-1-one:**

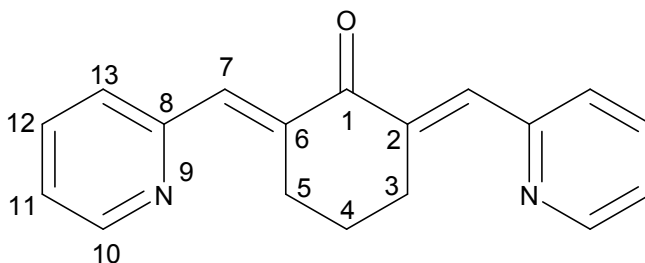

Yield: 60%. Pale white solid. Recrystallized with CHCl<sub>3</sub>-MeOH. <sup>1</sup>H NMR:δ8.70 (d, 2H, H-10, J=4.4 Hz), δ7.71 (t, 2H, H-12, J=7.6Hz), δ7.69 (s, 2H, H-7), δ7.44(d, 2H, H-13, J=7.6),7.11(m, 2H, H-11), δ3.31(t, 4H, H-3 and H -5, J=6.4Hz), andδ1.28(quintet, 2H, H-4, J=6.4Hz).<sup>13</sup>C NMR: δ191.39(C=O), δ155.52 (C-8), δ149.52 (C-10),δ140.11 (C-2 and C-6),δ136.14 (C-12), δ134.02 (C-7), δ127.13 (C-13), 122.46 (C-11), δ28.47 (C-3 and C-5), andδ22.24 (C-4). IR(KBr, cm<sup>-1</sup>):1705( ), 1604 (C=C stretch), 1583, 1465, 1437 (ring stretching bands in pyridine), 991, 856(C-H oop ). MS (*m/z*):276 [M]<sup>+</sup>; UV: (MeOH): 265, 364 nm.

(<sup>1</sup>H and <sup>13</sup>C NMR spectra of these compounds are provided at the end of this document)

**4.References:**

- 1) A.I. Vogel, B.S. Furniss, Vogel's Textbook of Practical Organic Chemistry, 5<sup>th</sup>edn., Longman, Harlow, 1996

**PMR spectrum of 2,6-(Dibenzylidene)cyclohexanone(Ia):**

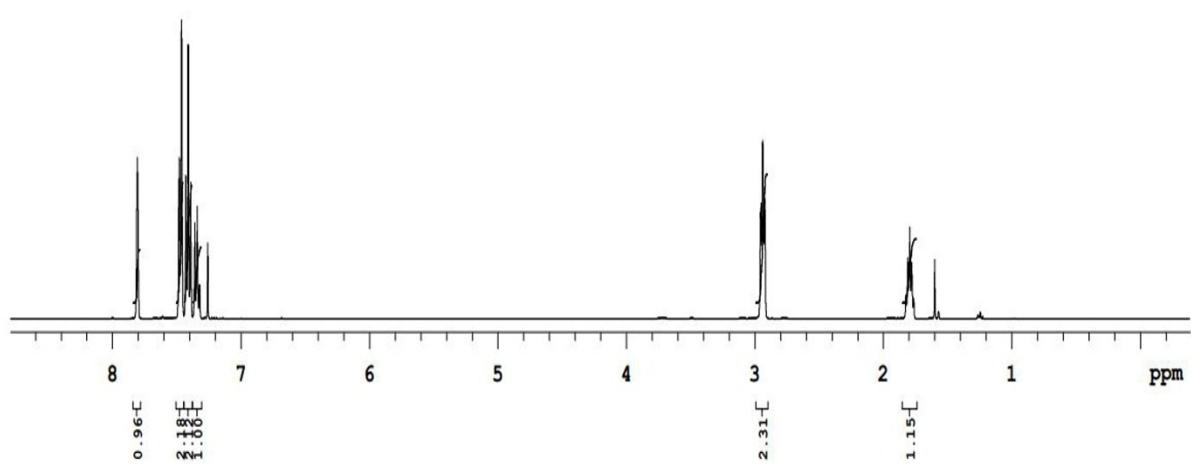

**<sup>13</sup>C NMR spectrum of 2,6-(Dibenzylidene)cyclohexanone (Ia):**

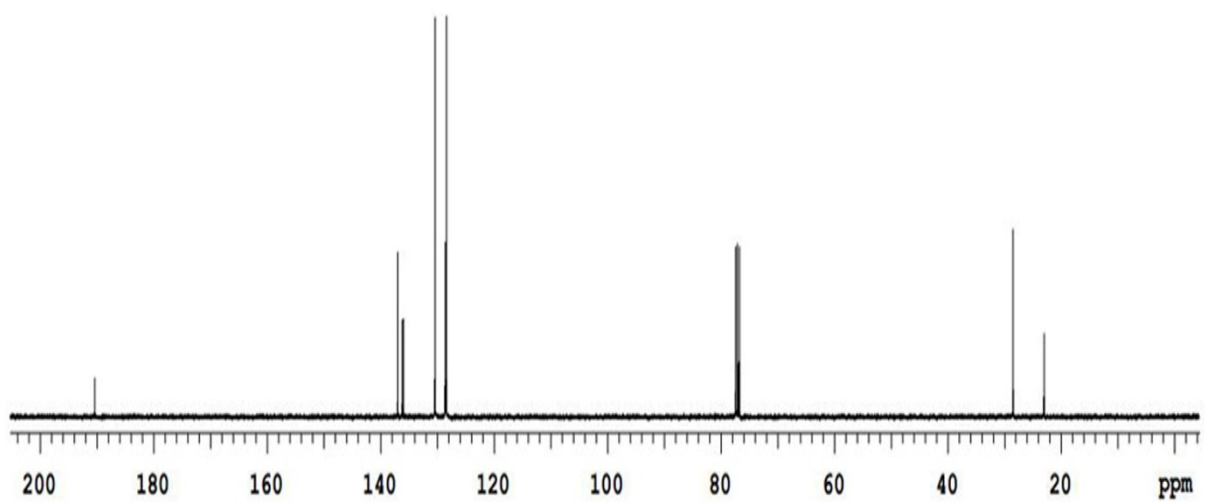

**Mass spectrum of 2, 6-(Dibenzylidene)cyclohexanone(I a):**

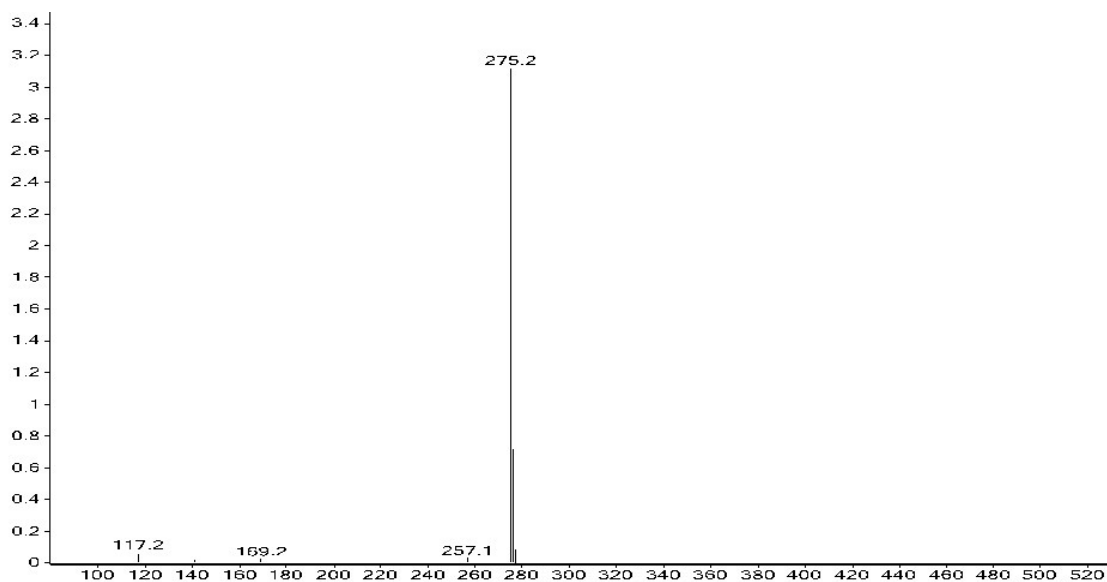

**PMR spectrum of 2,6-Bis(3-nitro-benzylidene)cyclohexanone (Ib):**

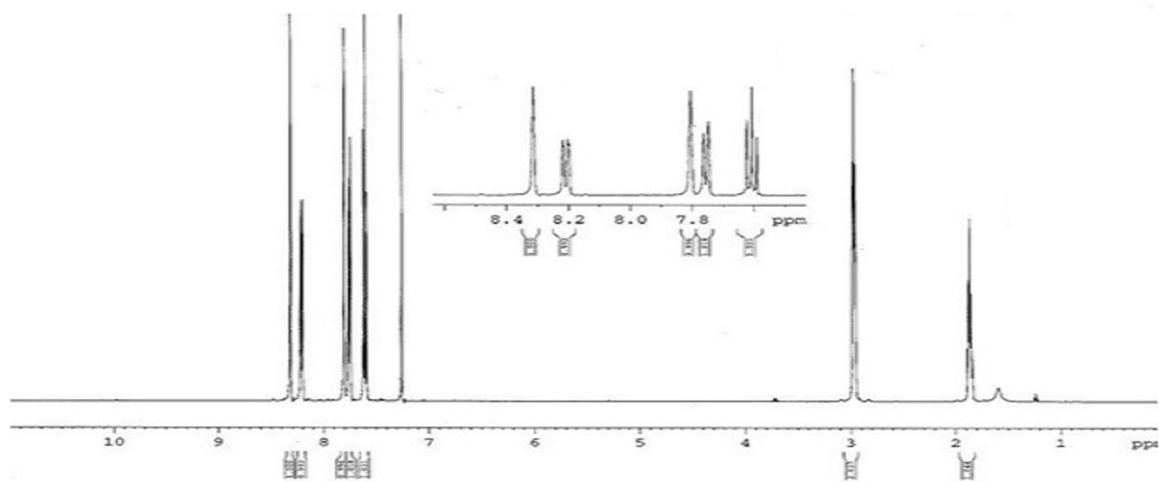



**$^{13}\text{C}$  NMR spectrum of 2,6-Bis(2-hydroxybenzylidene)cyclohexanone(Ib):**

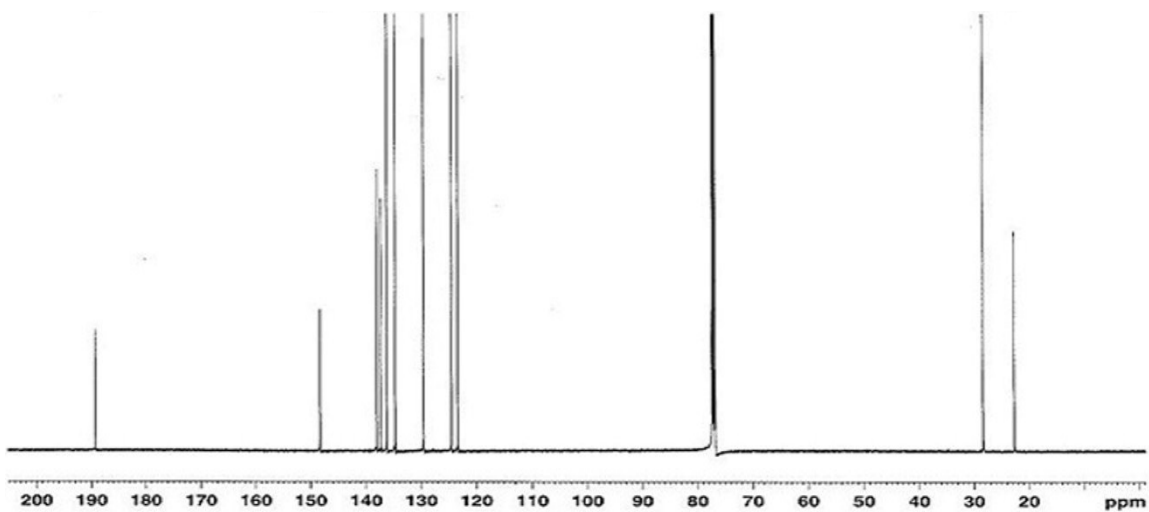

**Mass spectrum of 2,6-Bis(3-nitro-benzylidene)cyclohexanone (I b):**

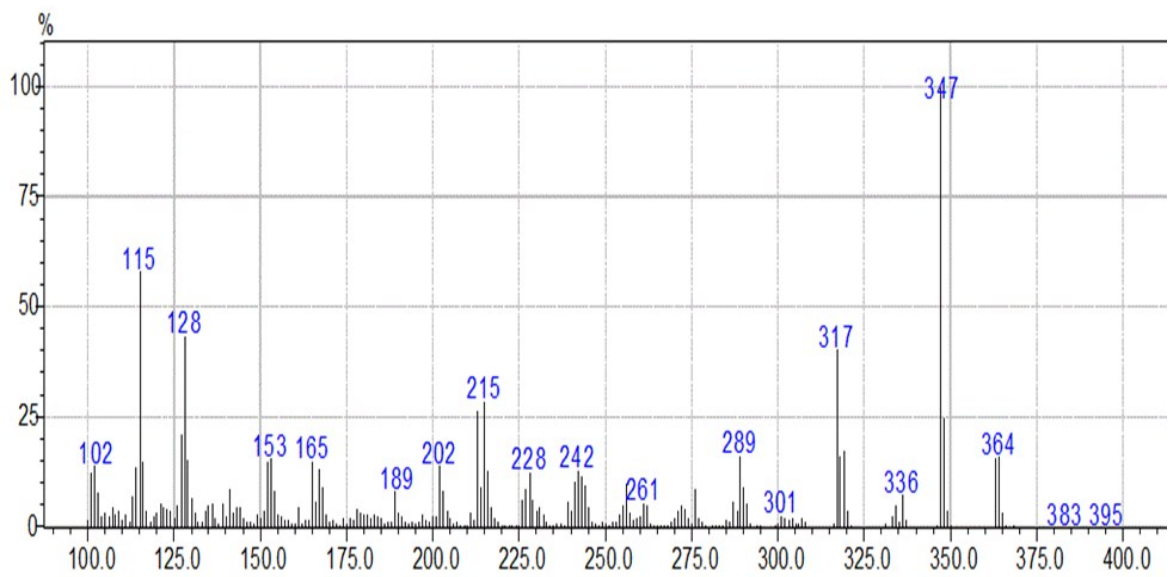

PMR spectrum of 2,6-Bis(2-chlorobenzylidene)cyclohexanone (Ic):

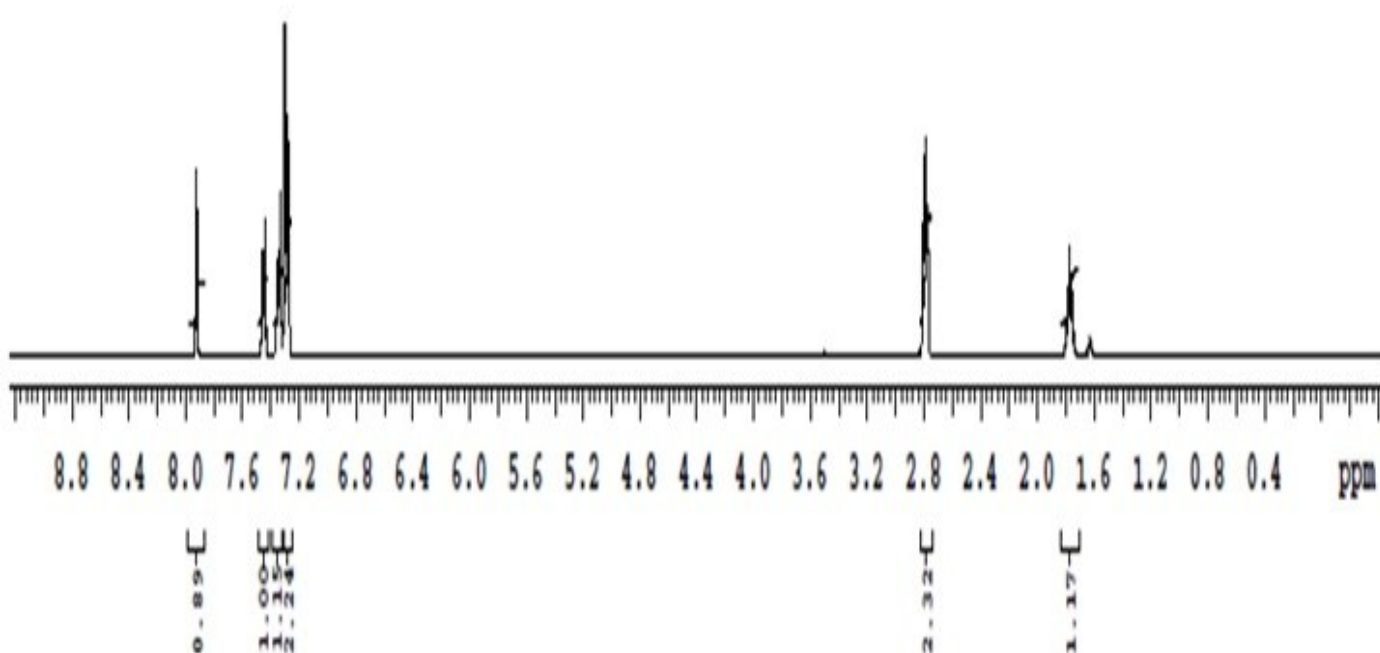

<sup>13</sup>CNMR spectrum of 2,6-Bis(2-chlorobenzylidene)cyclohexanone (Ic):

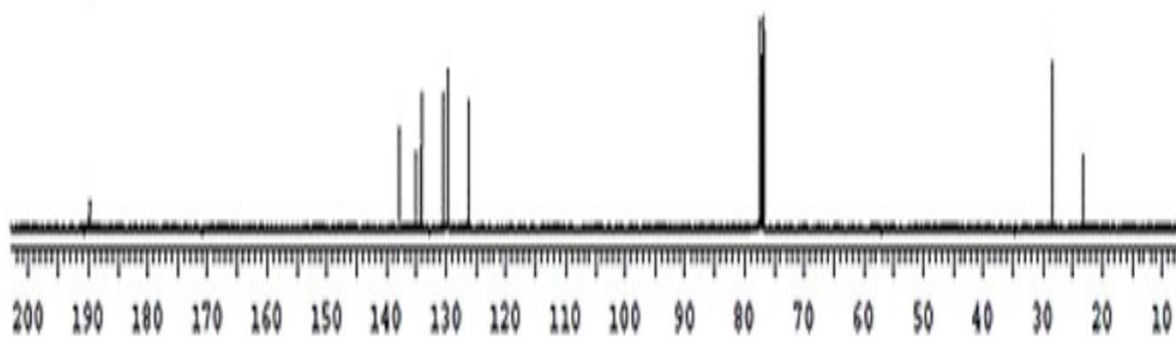

Mass spectrum of 2,6-Bis(2-chlorobenzylidene)cyclohexanone (I c):

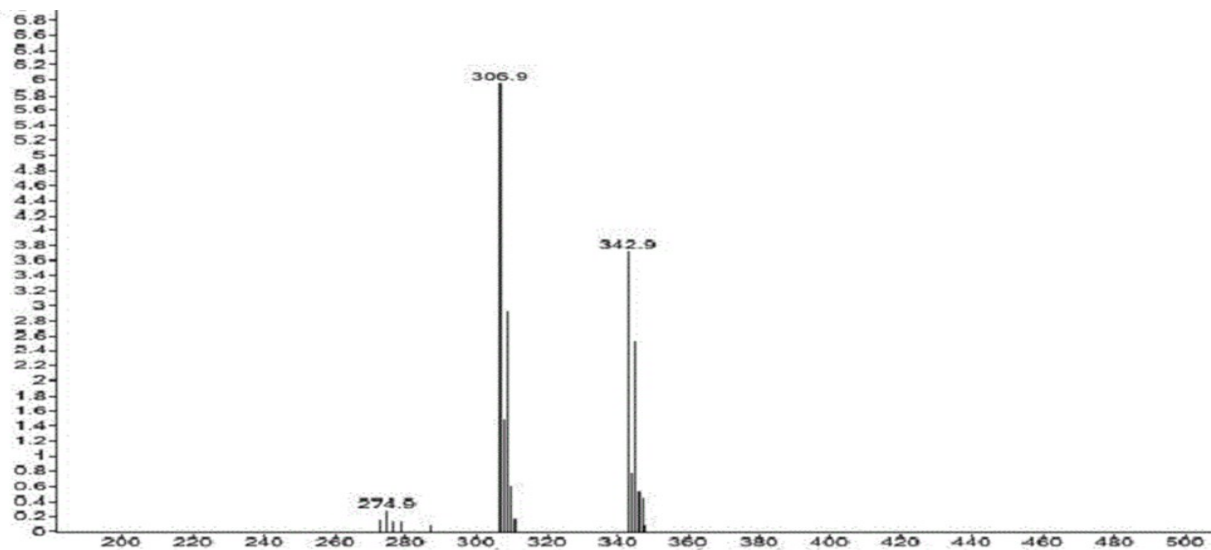

PMR spectrum of 2,6-Bis(3-chlorobenzylidene)cyclohexanone (Id):

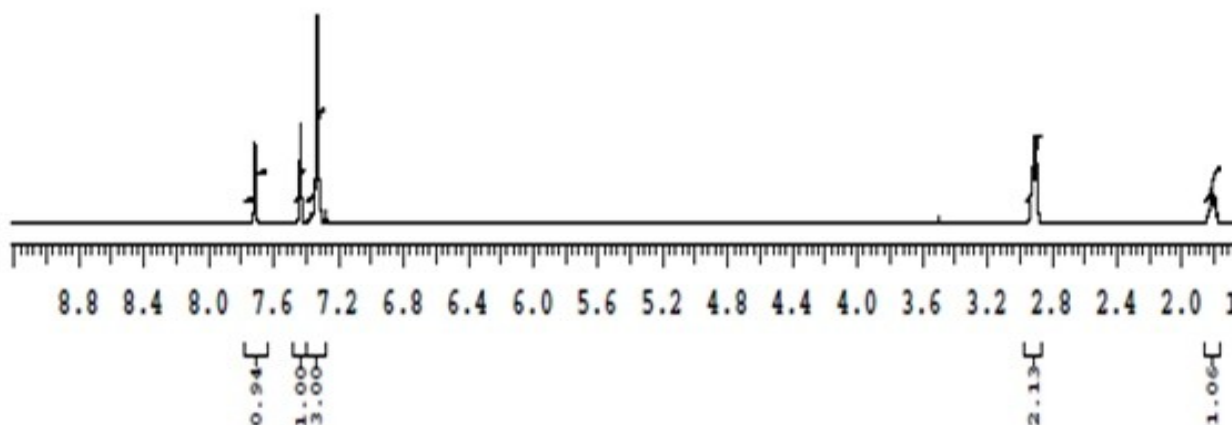

<sup>13</sup>CNMR spectrum of 2,6-Bis(3-chlorobenzylidene)cyclohexanone (Id):

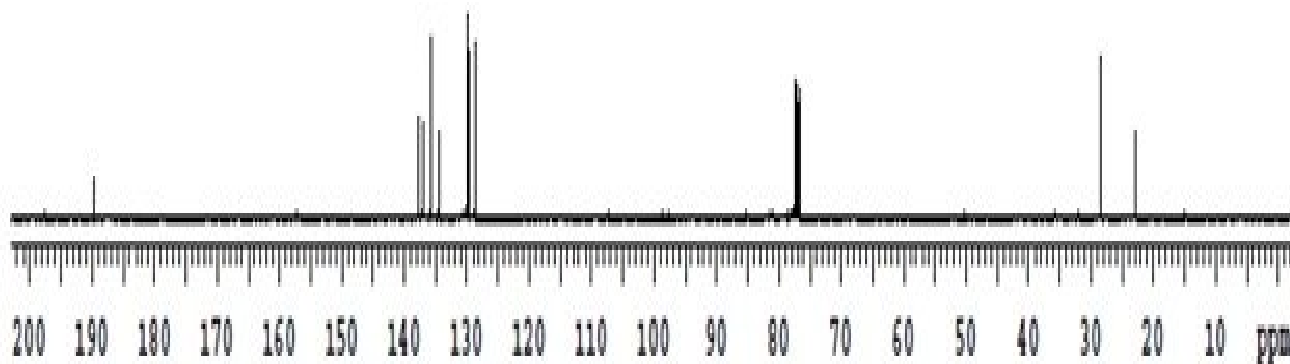

Mass spectrum of 2,6-Bis(3-chlorobenzylidene)cyclohexanone (I d):

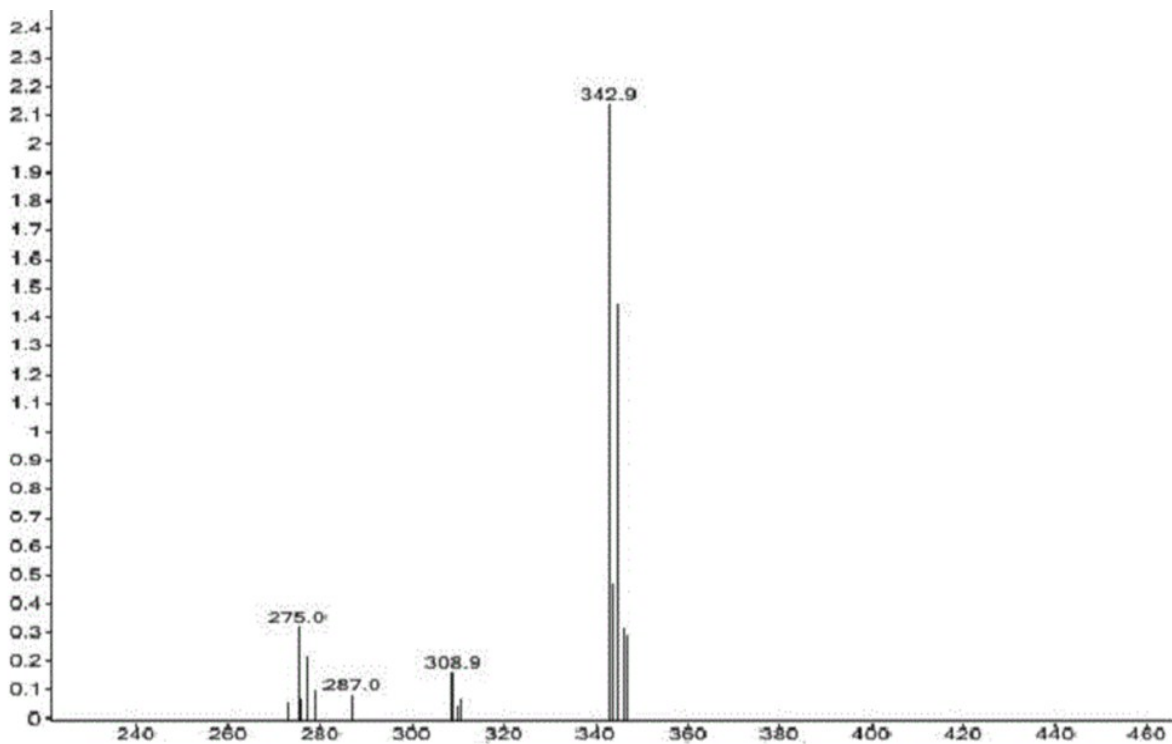

PMR spectrum of 2,6-Bis(4-chlorobenzylidene)cyclohexanone(Ie):

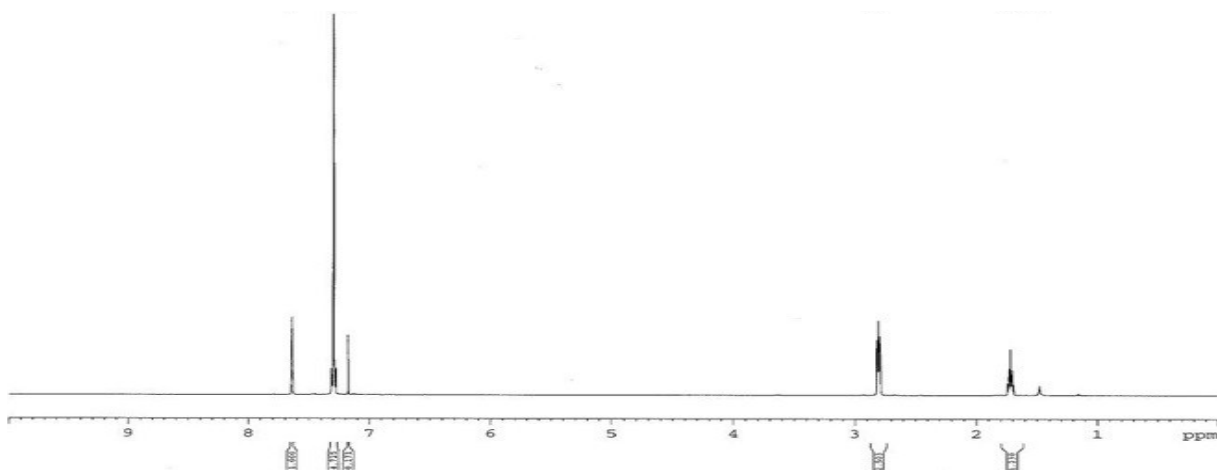

**$^{13}\text{C}$ NMR spectrum of 2,6-Bis(4-chlorobenzylidene) cyclohexanone(Ie):**

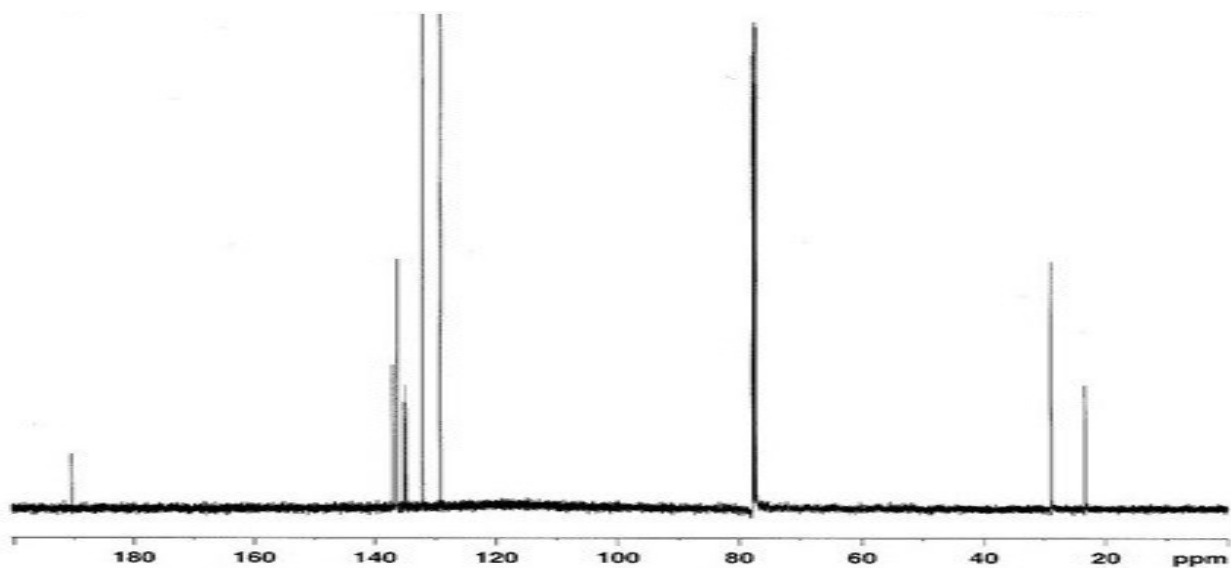

**Mass spectrum of 2,6-Bis(4-chlorobenzylidene) cyclohexanone(I e):**

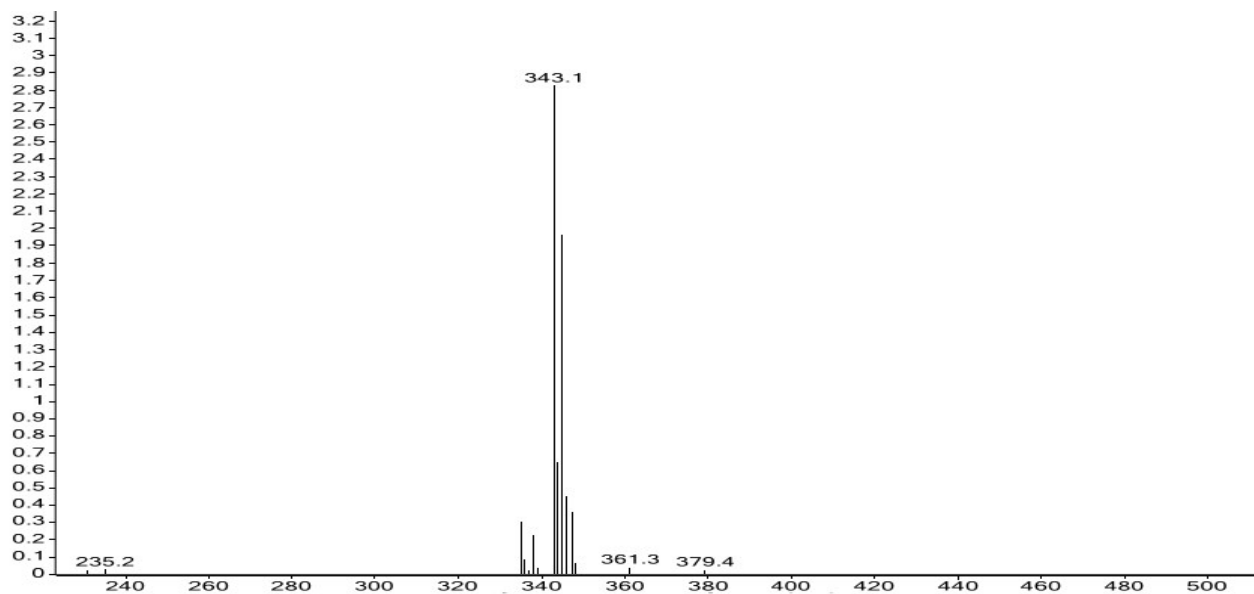

**PMR spectrum of 2,6-Bis-(4-methoxybenzylidene) cyclohexanone (If):**

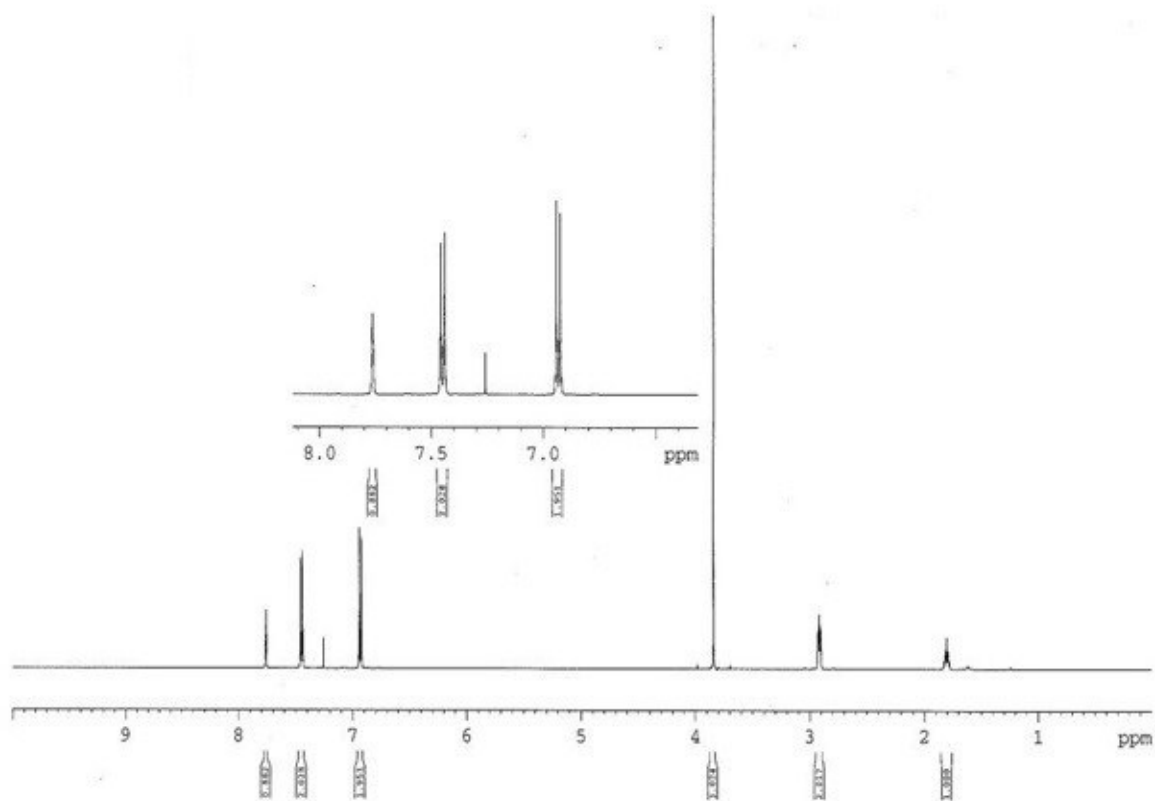

**<sup>13</sup>CNMR spectrum of 2,6-Bis-(4-methoxybenzylidene) cyclohexanone (If):**

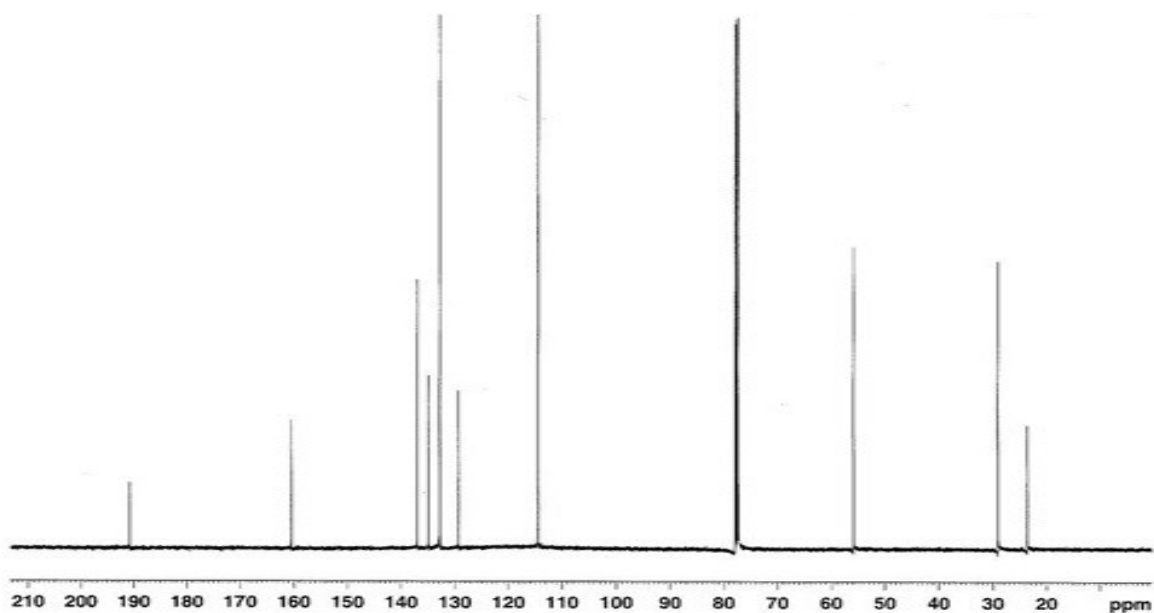

**Mass spectrum of 2,6-Bis-(4-methoxybenzylidene) cyclohexanone (I f):**

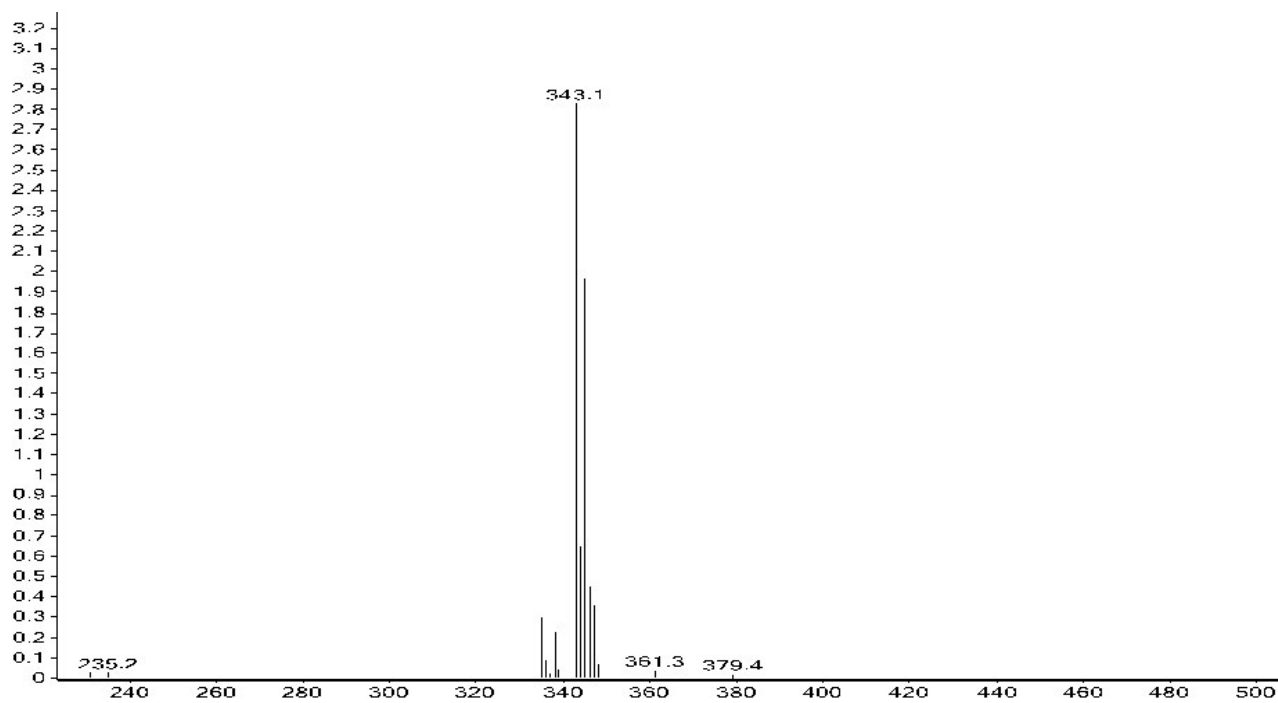

**PMR 2, 6-Bis-(4-iso-propylbenzylidene) cyclohexanone (I g):**

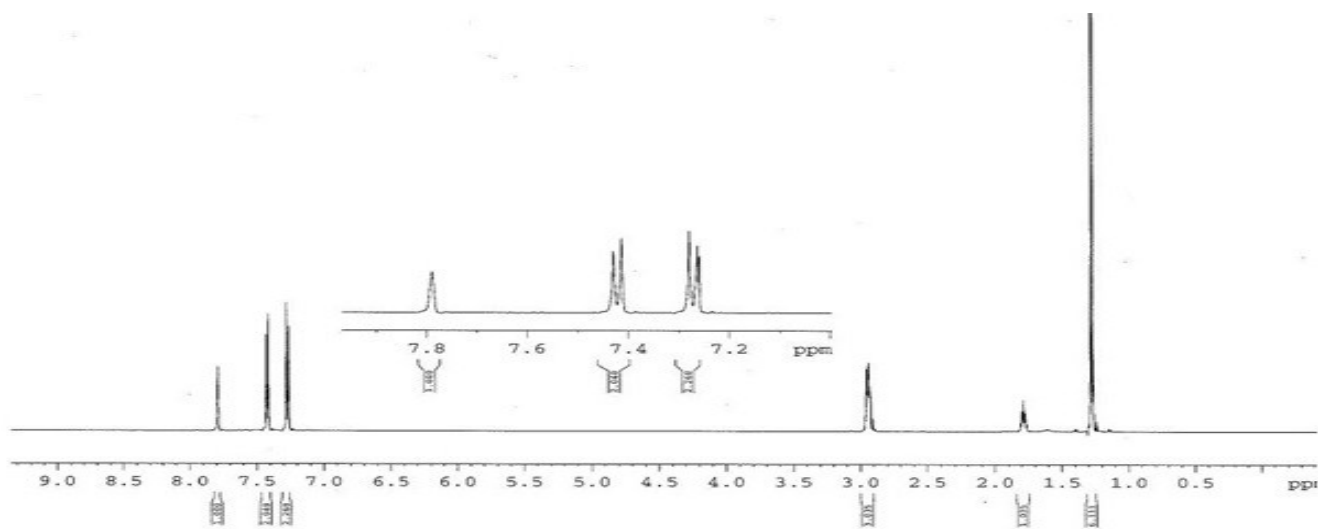

**$^{13}\text{C}$ NMR2, 6-Bis-(4-iso-propylbenzylidene) cyclohexanone (I g):**

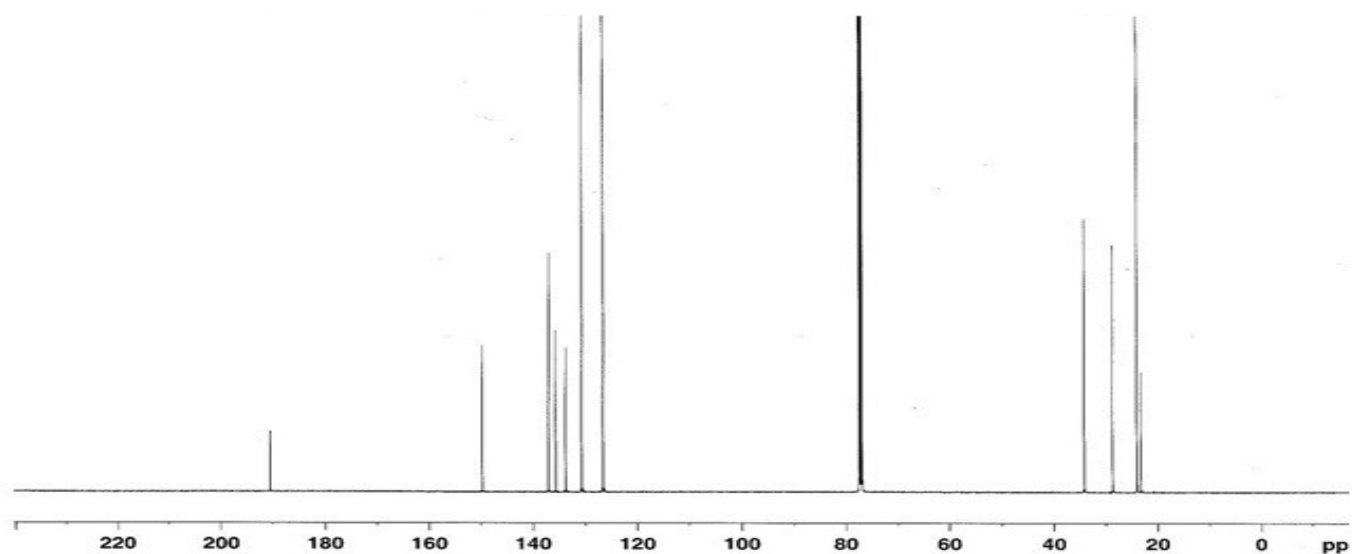

**Mass spectrum2, 6-Bis-(4-iso-propylbenzylidene) cyclohexanone (I g):**

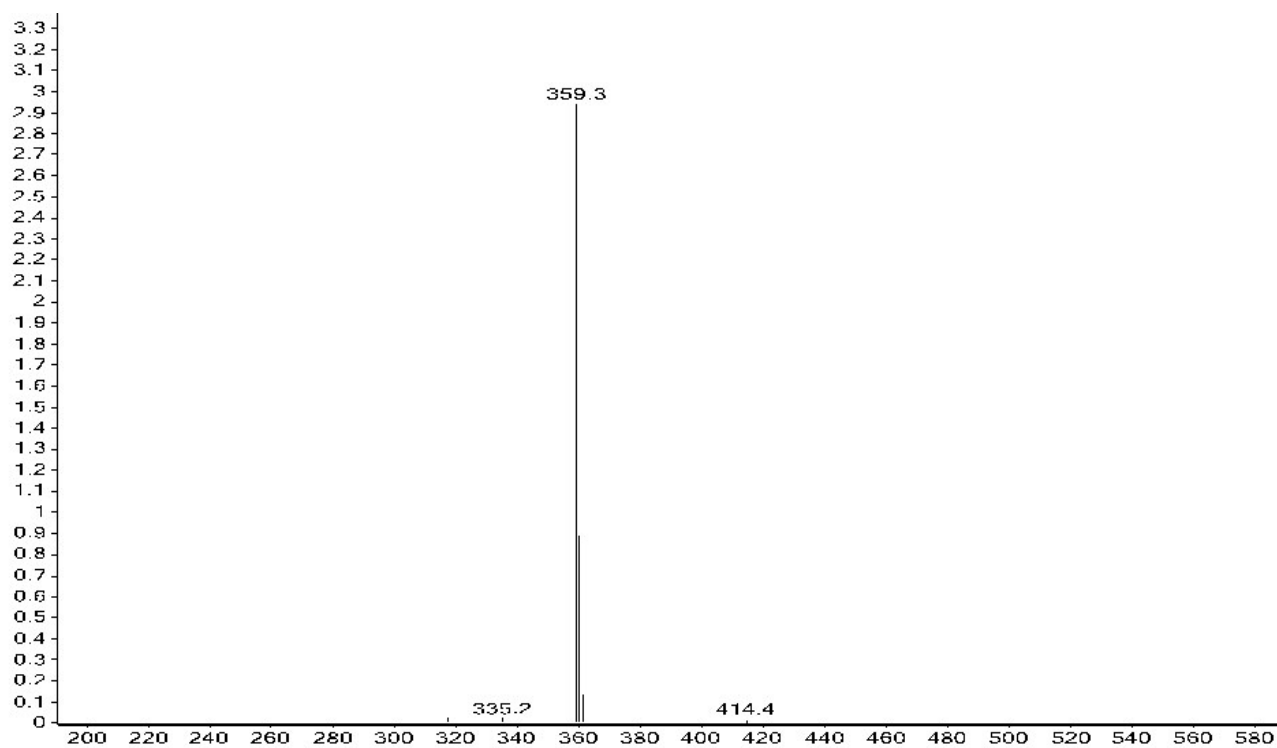



**<sup>1</sup>H NMR 2,6-bis((E)-4-(dimethylamino)benzylidene)cyclohexanone (Ih)**

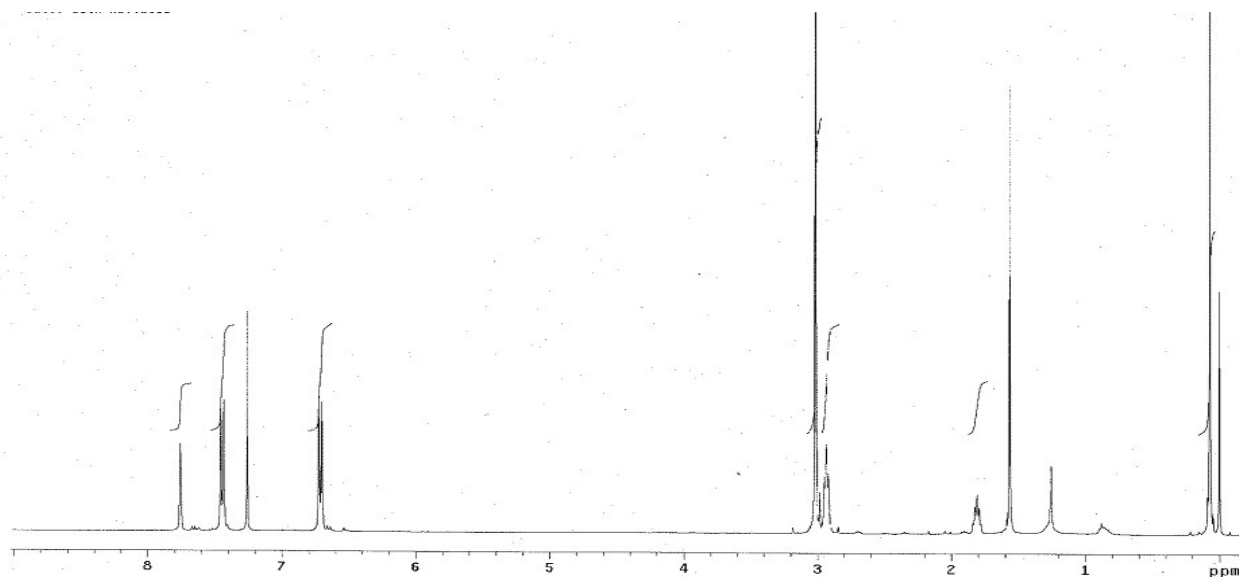

**<sup>13</sup>C NMR 2,6-bis((E)-4-(dimethylamino)benzylidene)cyclohexanone (Ih)**

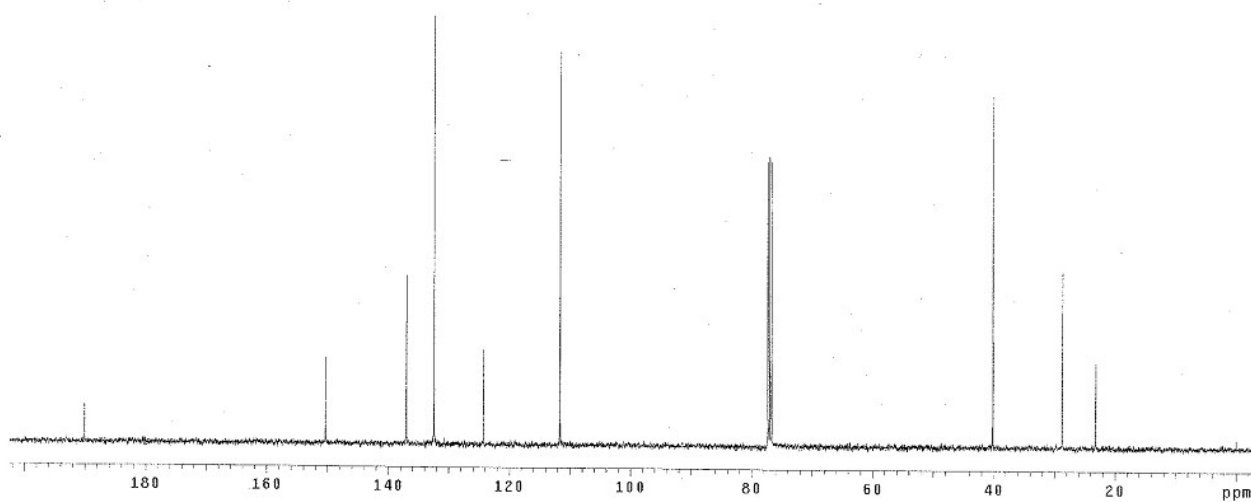

### Mass spectrum of 2,6-bis((E)-4-(dimethylamino)benzylidene)cyclohexanone (Ih)

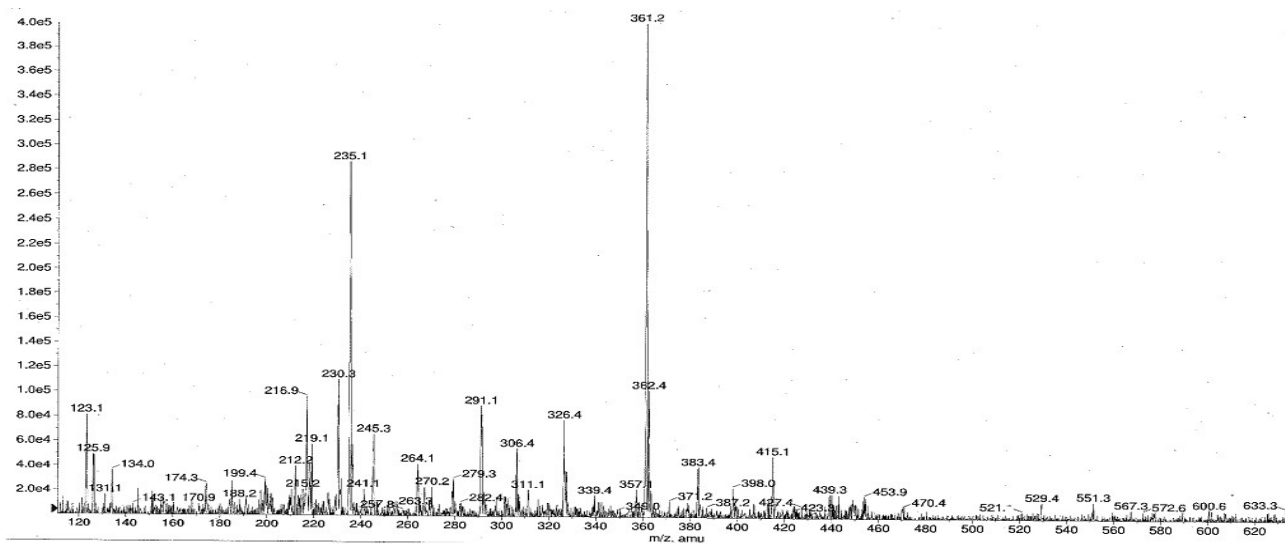

### <sup>1</sup>H NMR spectrum of 2,6-Bis(4-methylthiobenzylidene)cyclohexanone (Ii)

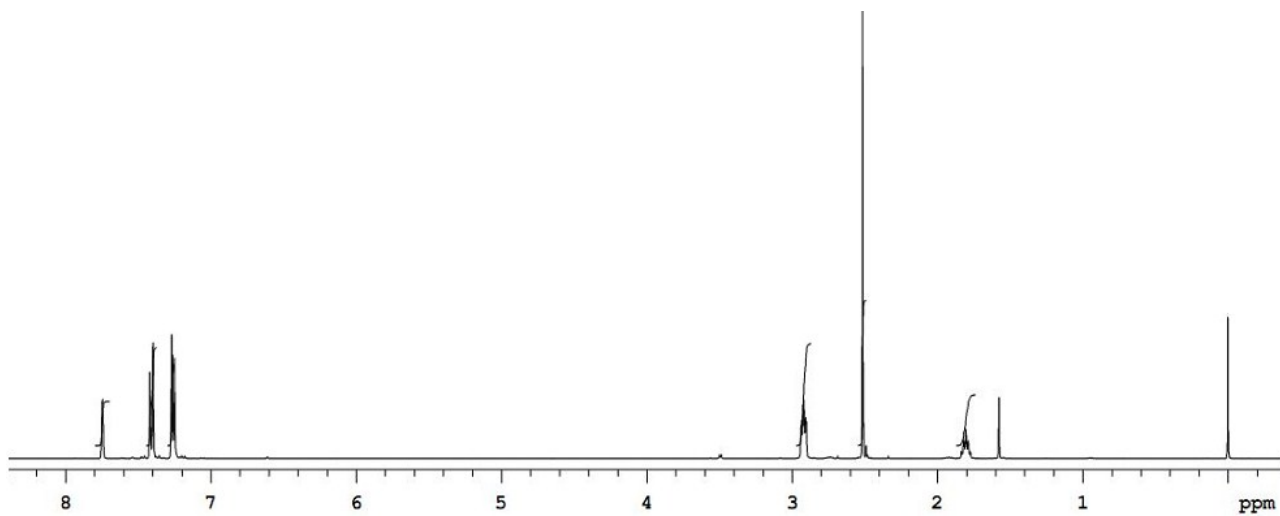

**$^{13}\text{C}$  NMR, 6-Bis(4-methylthiobenzylidene)cyclohexanone (II)**

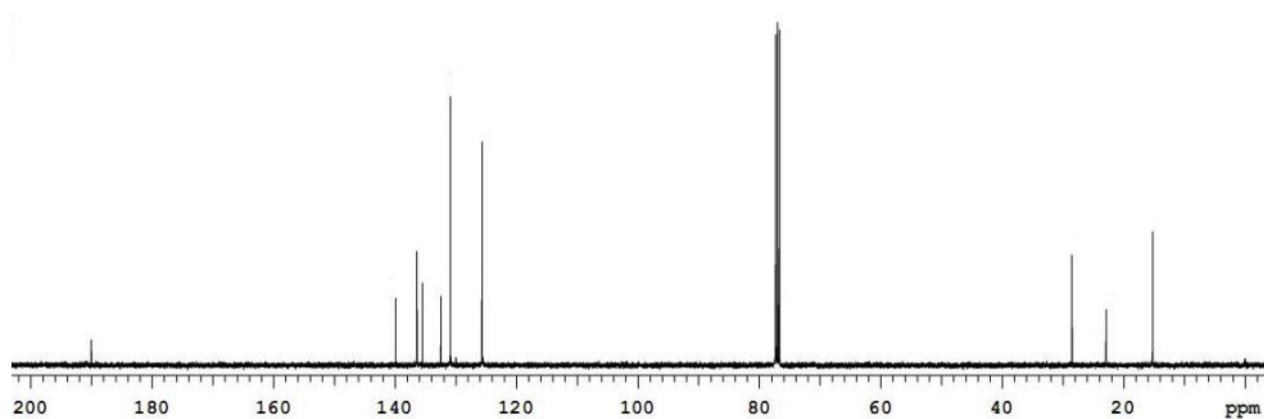

**Mass spectrum of 6-Bis(4-methylthiobenzylidene)cyclohexanone (II)**

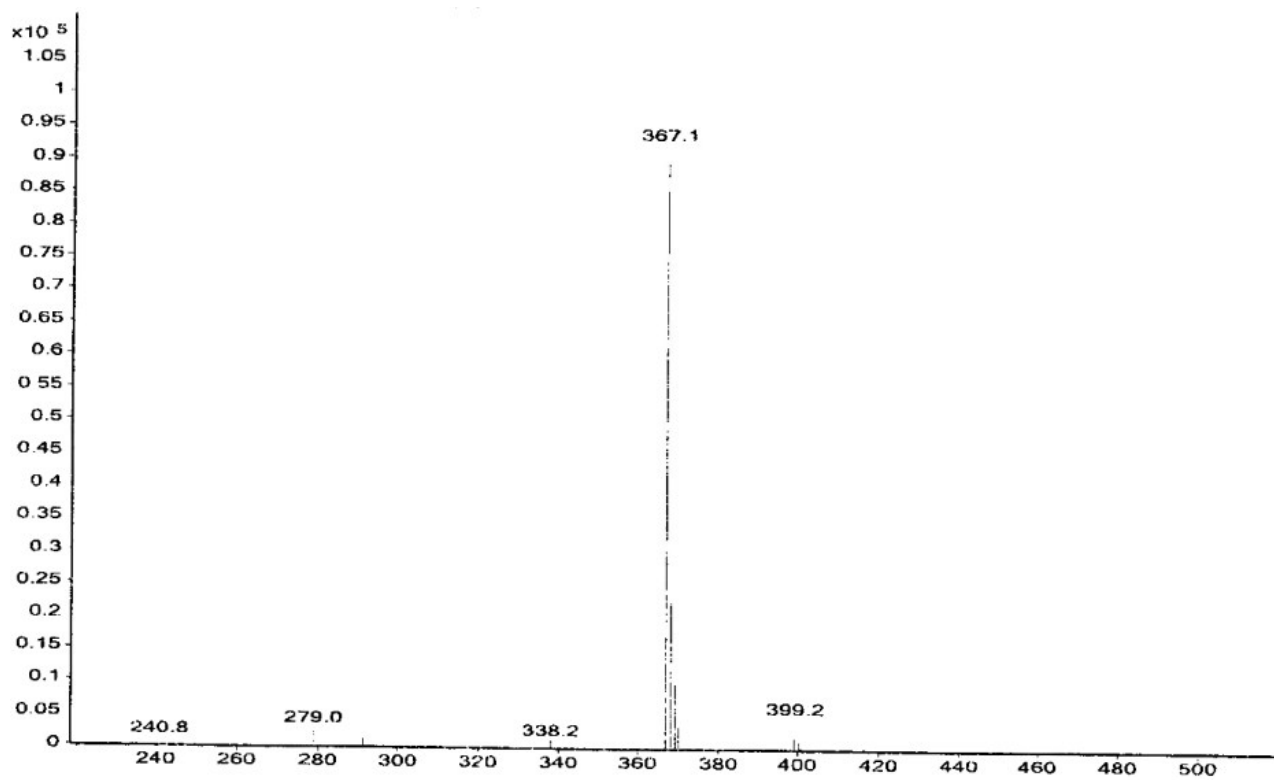

**PMR spectrum of 2, 6-Bis-(cinnamylidene ) cyclohexanone (Ij):**

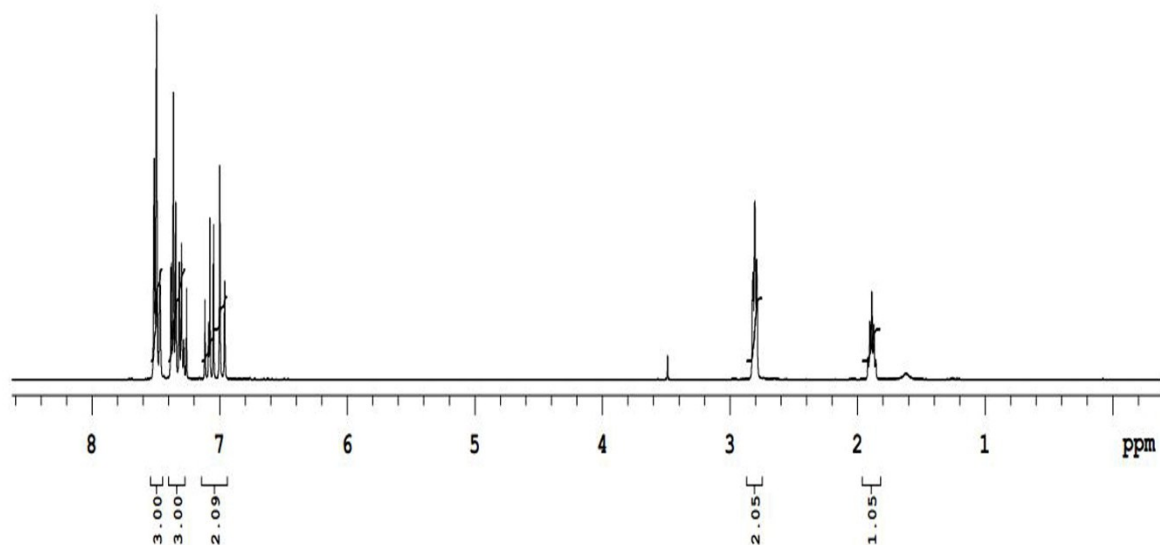

**<sup>13</sup>CNMR spectrum of 2, 6-Bis-(cinnamylidene ) cyclohexanone (Ij):**

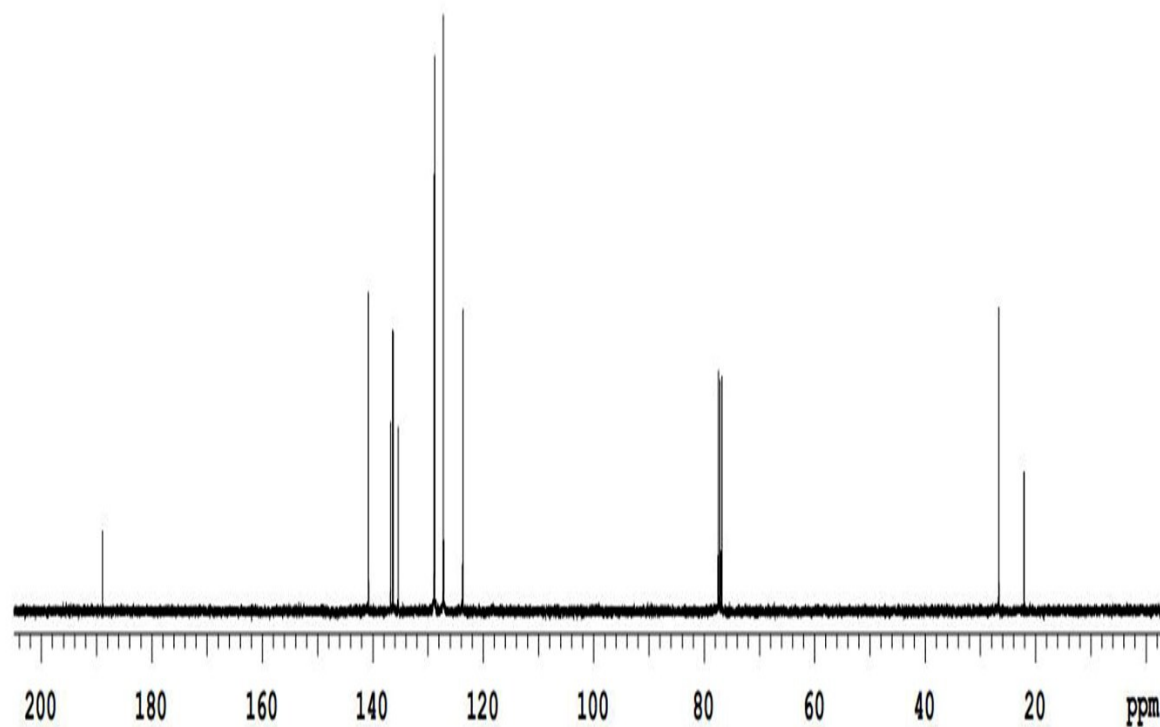

**Mass spectrum of 2, 6-Bis-(cinnamylidene ) cyclohexanone (Ij):**

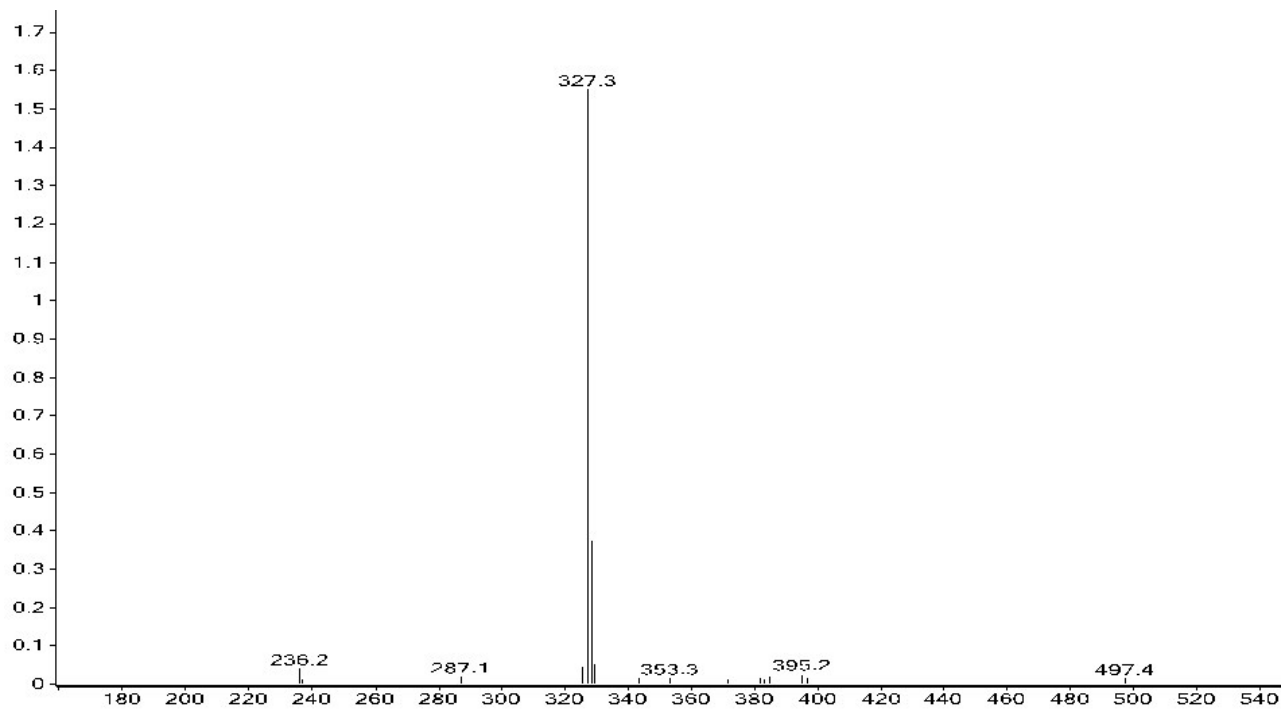

**PMR spectrum of 2, 6-Bis-(2-furanylidene) cyclohexanone (IIa):**

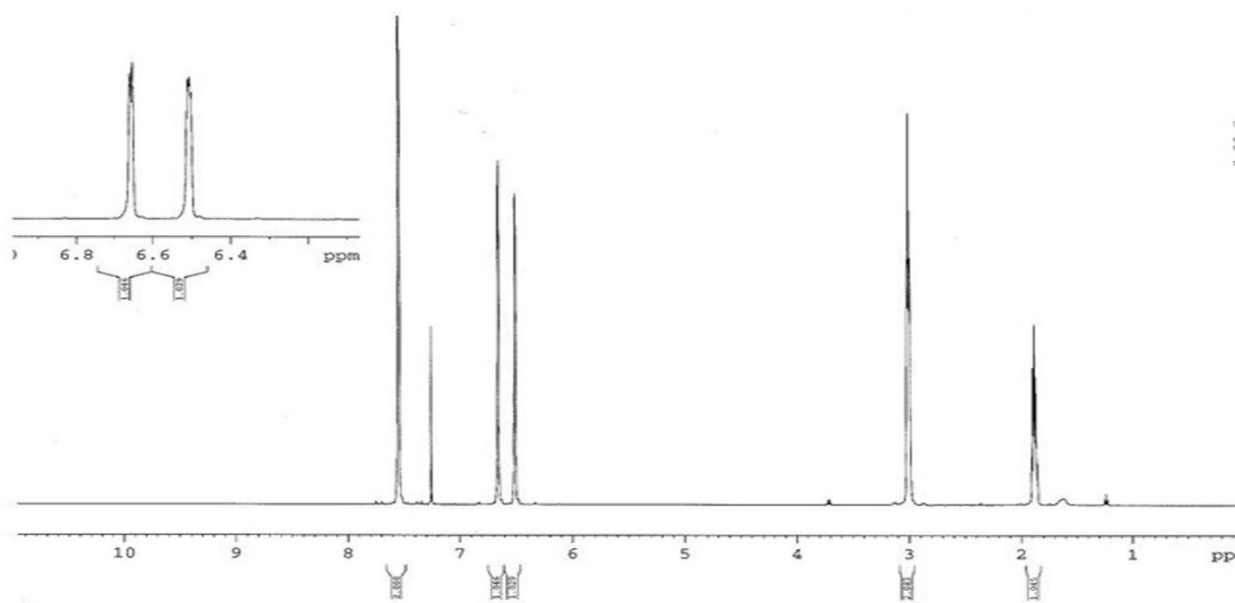

**<sup>13</sup>C NMR spectrum of 2, 6-Bis-(2-furanylidene) cyclohexanone (IIa):**

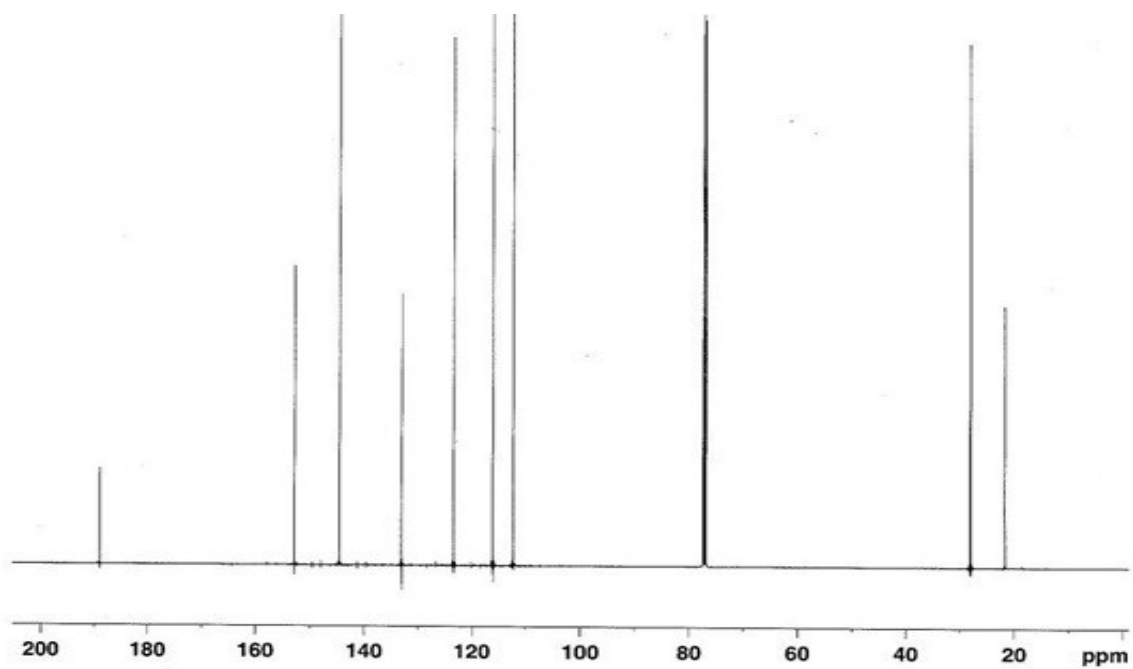

**Mass spectrum of 2, 6-Bis-(2-furanylidene) cyclohexanone (II a):**

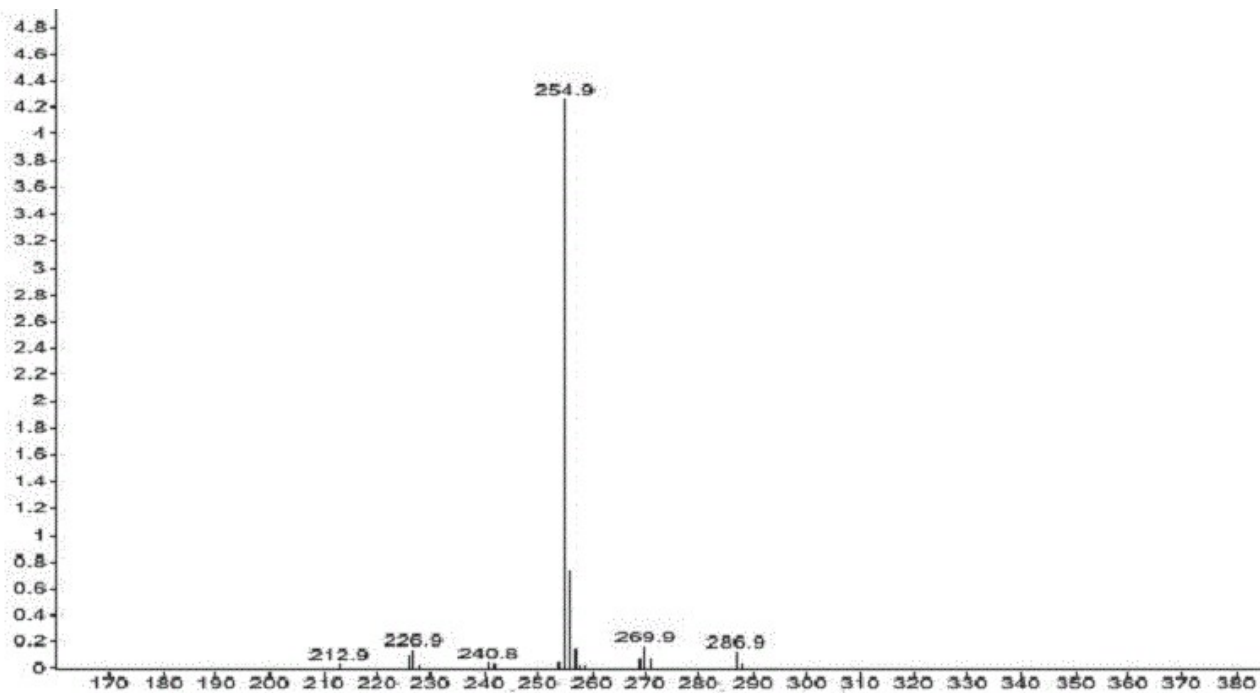

**PMR spectrum of 2,6-Bis-(2-pyrrolylidene) cyclohexanone (IIb):**

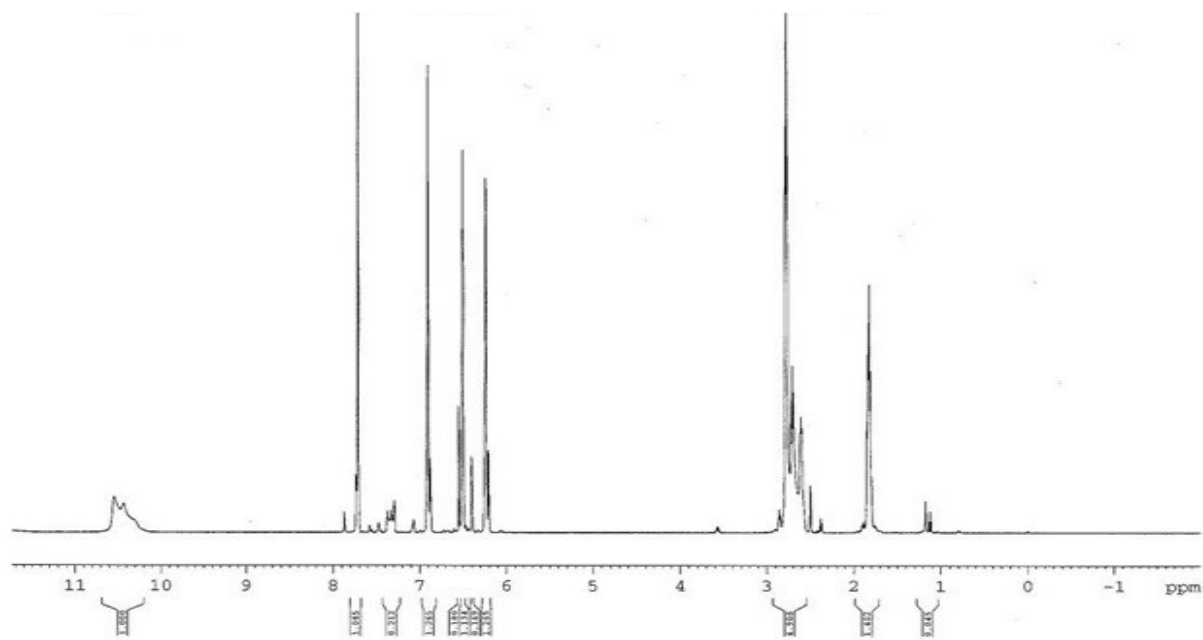

**<sup>13</sup>CNMR spectrum of 2,6-Bis-(2-pyrrolylidene) cyclohexanone (IIb):**

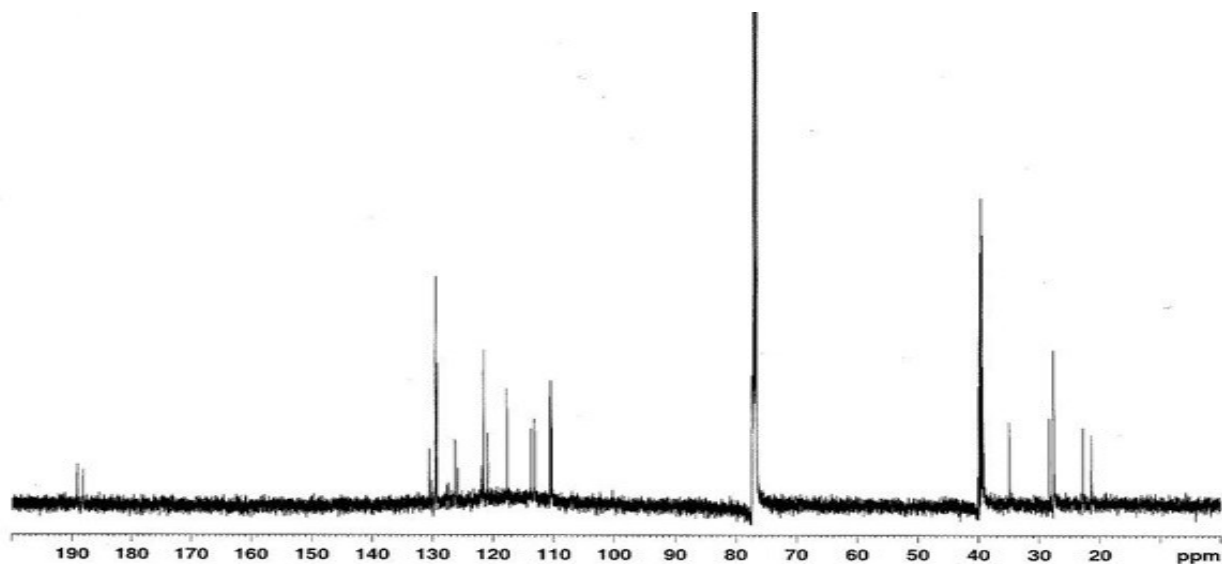

**Mass spectrum of 2,6-Bis-(2-pyrrolylidene) cyclohexanone (II b):**

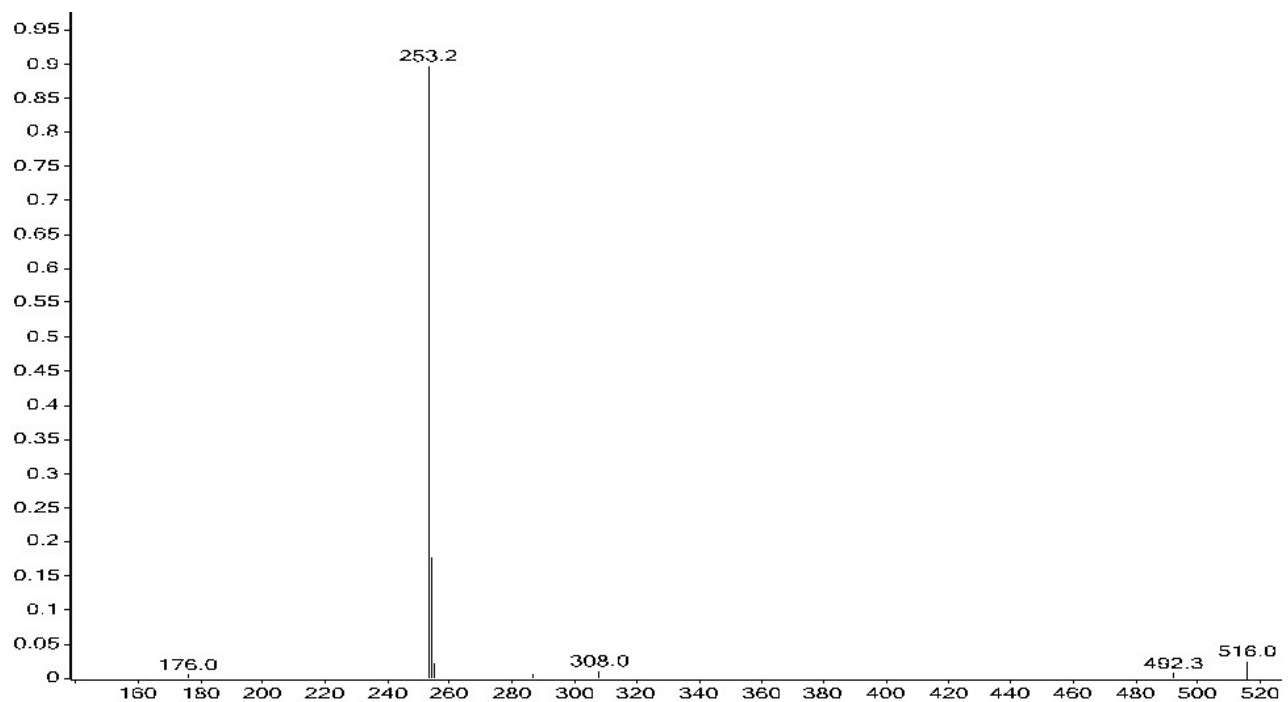

**PMR spectrum of 2,6-Bis-(2-thienylidene) cyclohexanone(IIc):**

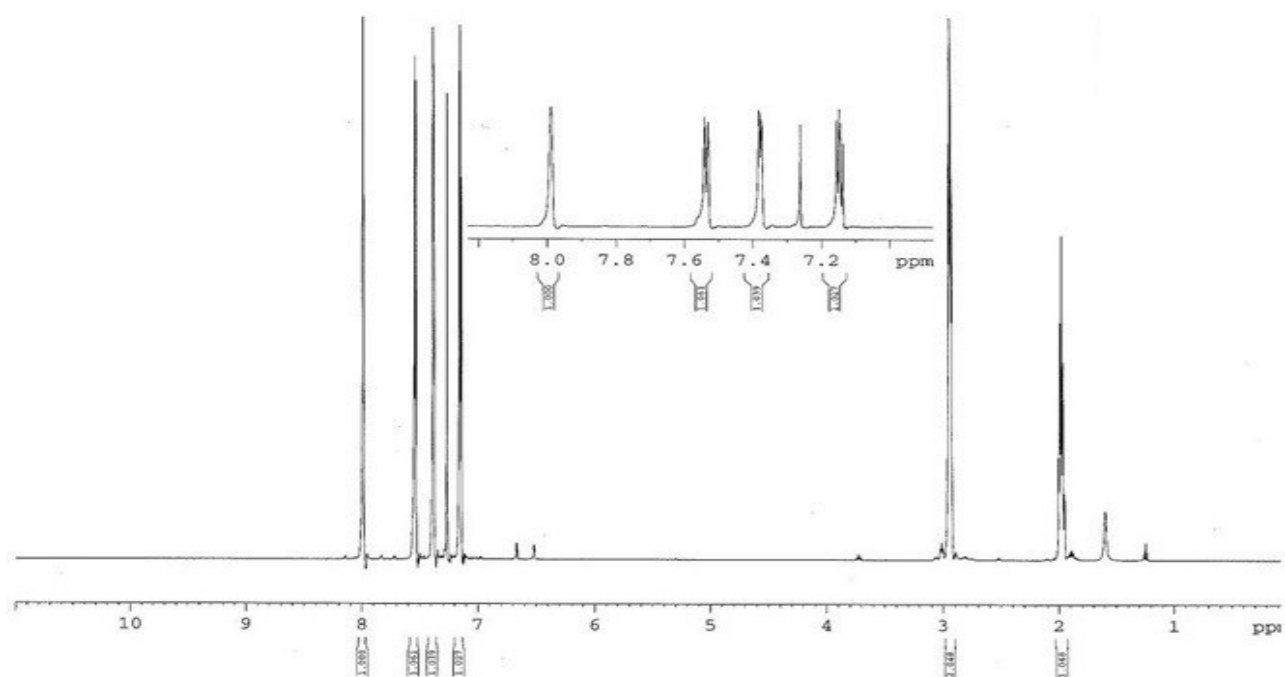



**$^{13}\text{C}$  NMR spectrum of 2,6-Bis-( 2-thienylidene) cyclohexanone(IIc):**

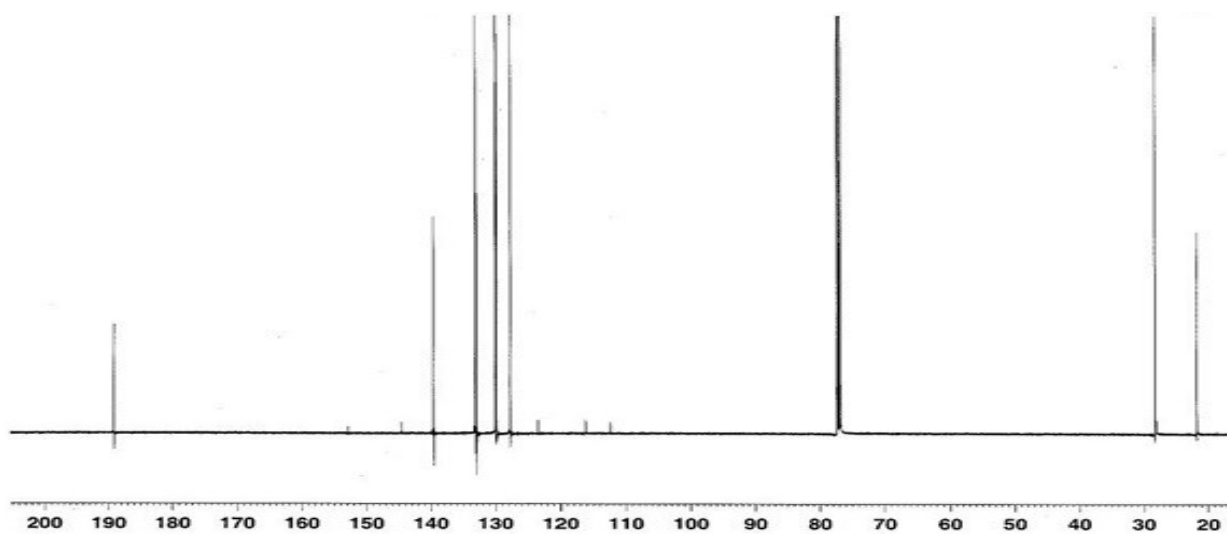

**Mass spectrum of 2,6-Bis-( 2-thienylidene) cyclohexanone(II c):**

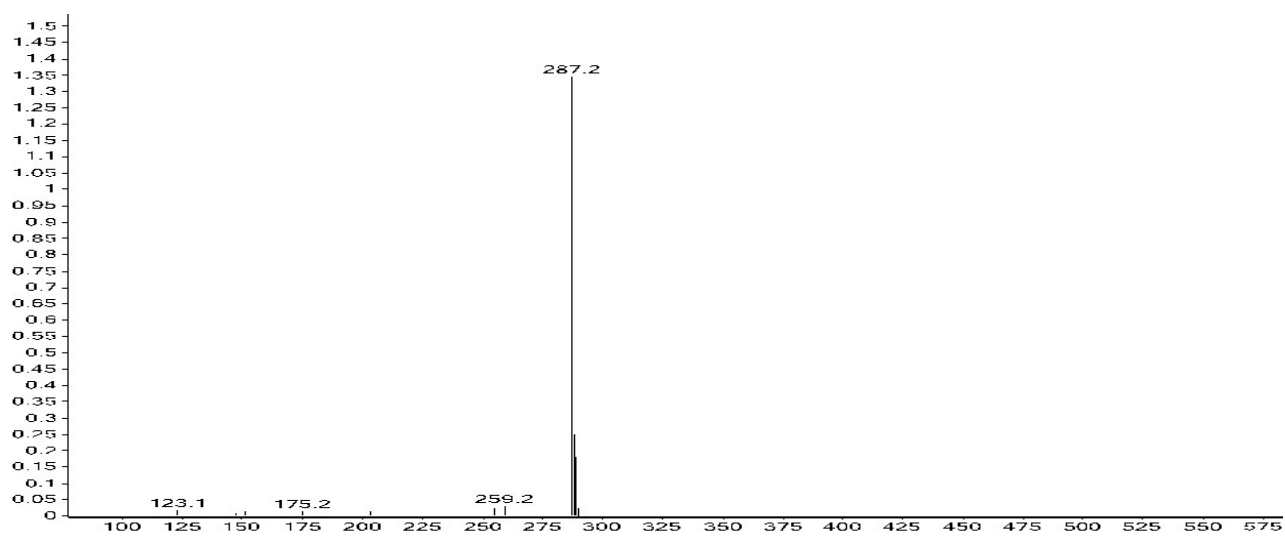

**PMR spectrum of 2,6-Bis-( 3-thienylidene) cyclohexanone(IIIa):**

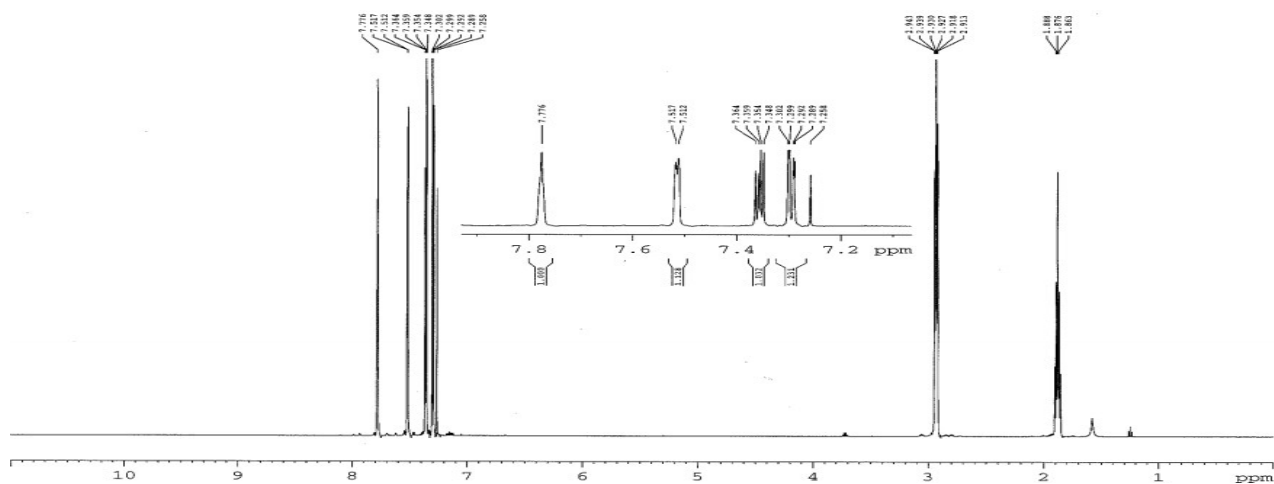

**PMR spectrum of 2,6-Bis(pyridin-2-ylmethylene)cyclohexan-1-one(IVa):**

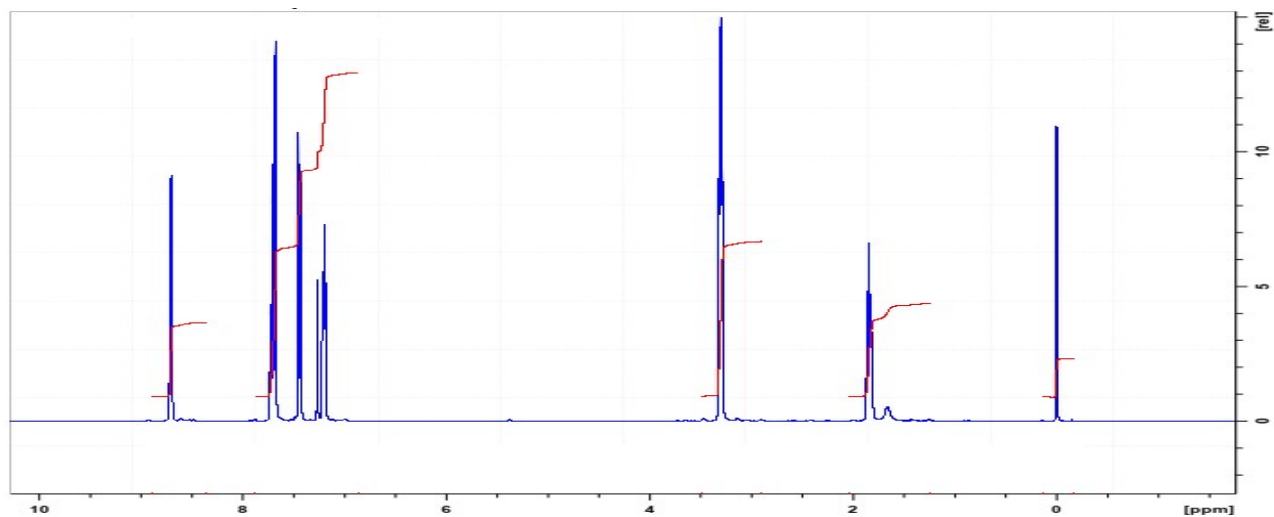

**<sup>13</sup>CNMR spectrum of 2,6-Bis(pyridin-2-ylmethylene)cyclohexan-1-one(IVa):**

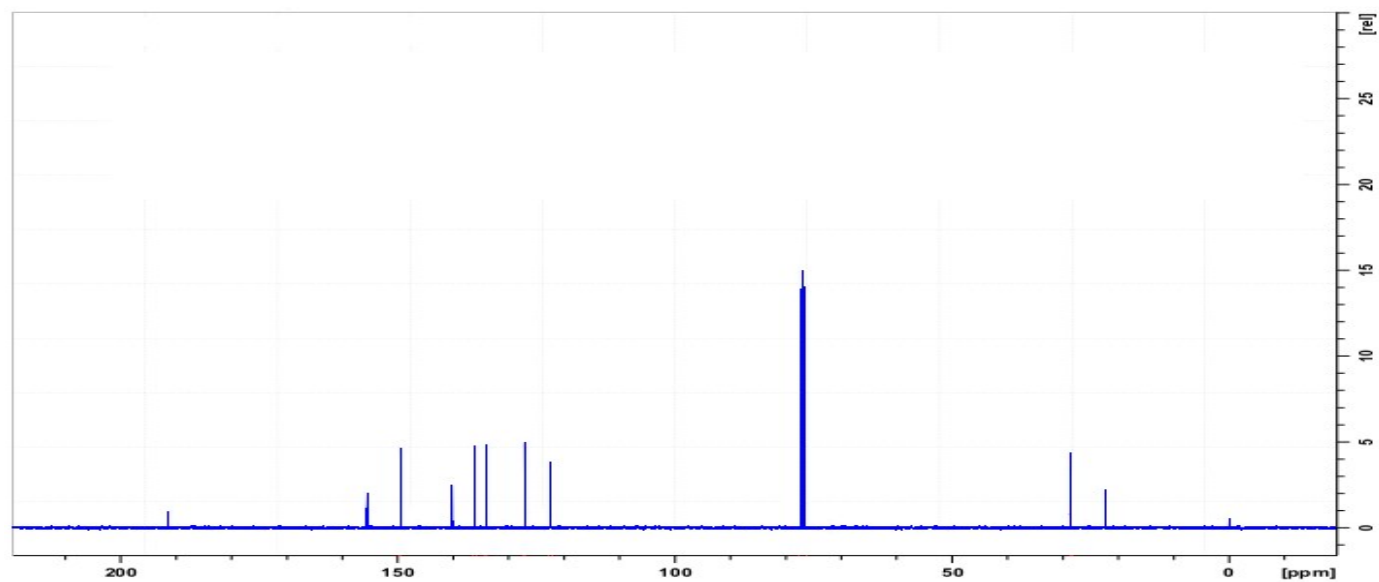

**Mass spectrum of 2,6-Bis(pyridin-2-ylmethylene)cyclohexan-1-one(IVa):**

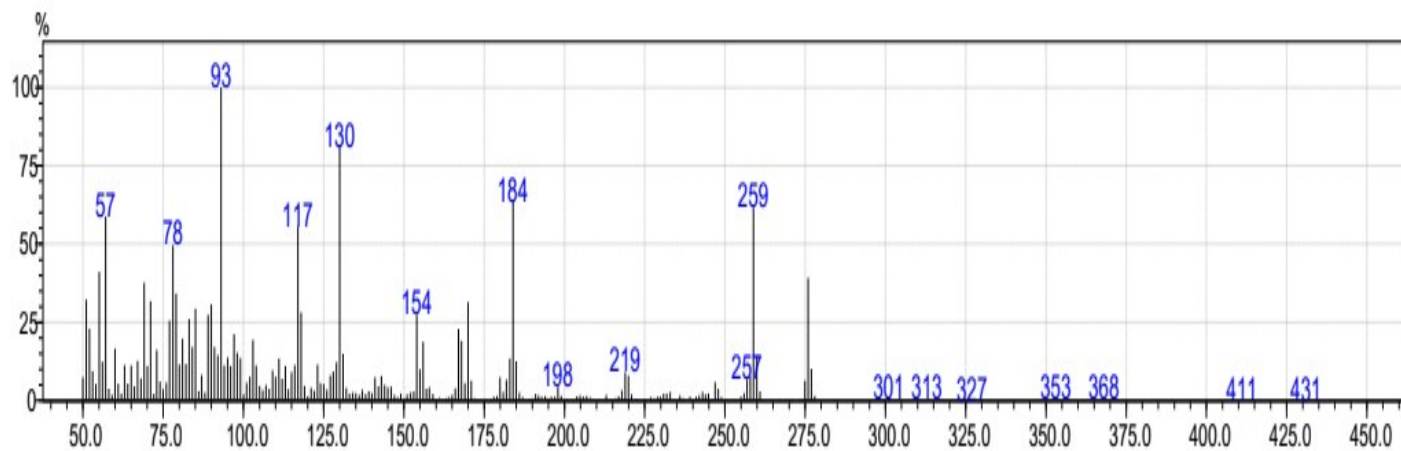

**SD Table Ia: Bond lengths (Å) comparison**

| <b>ATOMS</b> | <b>Gaussian</b> | <b>Experimental</b> |
|--------------|-----------------|---------------------|
| C11 C10      | 1.76            | 1.74                |
| C12 C19      | 1.76            | 1.74                |
| O1 C1        | 1.22            | 1.22                |
| C7 C6        | 1.35            | 1.33                |
| C7 C8        | 1.47            | 1.46                |
| C7 H7        | 1.09            | 0.93                |
| C14 C2       | 1.35            | 1.34                |
| C14 C15      | 1.47            | 1.46                |
| C14 H14      | 1.09            | 0.93                |
| C20 C19      | 1.39            | 1.37                |
| C20 C15      | 1.41            | 1.39                |
| C20 H20      | 1.08            | 0.93                |
| C15 C16      | 1.41            | 1.40                |
| C9 C10       | 1.39            | 1.37                |
| C9 C8        | 1.41            | 1.39                |
| C9 H9        | 1.08            | 0.93                |
| C6 C1        | 1.51            | 1.50                |
| C6 C5        | 1.51            | 1.50                |
| C2 C1        | 1.51            | 1.50                |
| C2 C3        | 1.51            | 1.50                |
| C4 C3        | 1.53            | 1.51                |
| C4 C5        | 1.53            | 1.52                |
| C4 H4A       | 1.10            | 0.97                |
| C4 H4B       | 1.10            | 0.97                |
| C3 H3A       | 1.10            | 0.97                |
| C3 H3B       | 1.10            | 0.97                |
| C10 C11      | 1.39            | 1.38                |
| C13 C12      | 1.39            | 1.38                |
| C13 C8       | 1.41            | 1.39                |
| C13 H13      | 1.08            | 0.93                |
| C5 H5A       | 1.10            | 0.97                |
| C5 H5B       | 1.10            | 0.97                |
| C19 C18      | 1.39            | 1.38                |
| C16 C17      | 1.39            | 1.38                |
| C16 H16      | 1.08            | 0.93                |
| C11 C12      | 1.39            | 1.38                |
| C11 H11      | 1.08            | 0.93                |
| C17 C18      | 1.39            | 1.37                |
| C17 H17      | 1.08            | 0.93                |
| C18 H18      | 1.08            | 0.93                |
| C12 H12      | 1.08            | 0.93                |

### Bond Lengths Comparison

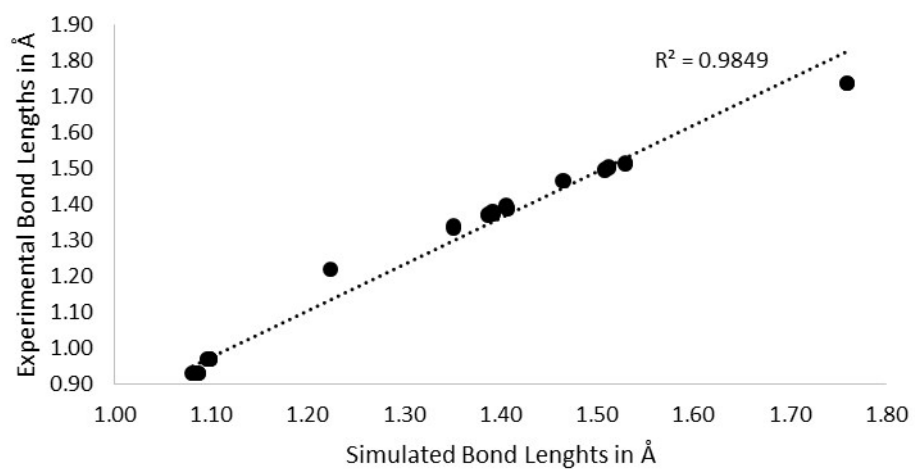

**SD Table Ib: Bond angles (°) comparison**

| <b>ATOMS</b> | <b>Gaussian</b> | <b>Experimental</b> |
|--------------|-----------------|---------------------|
| C6 C7 C8     | 130.12          | 128.64              |
| C6 C7 H7     | 114.86          | 115.70              |
| C8 C7 H7     | 115.00          | 115.70              |
| C2 C14 C15   | 130.13          | 129.80              |
| C2 C14 H14   | 114.86          | 115.10              |
| C15 C14 H14  | 114.99          | 115.10              |
| C19 C20 C15  | 120.31          | 120.20              |
| C19 C20 H20  | 119.84          | 119.90              |
| C15 C20 H20  | 119.85          | 119.90              |
| C20 C15 C16  | 118.17          | 117.90              |
| C20 C15 C14  | 124.38          | 123.33              |
| C16 C15 C14  | 117.41          | 118.60              |
| C10 C9 C8    | 120.30          | 120.80              |
| C10 C9 H9    | 119.84          | 119.60              |
| C8 C9 H9     | 119.86          | 119.60              |
| C7 C6 C1     | 115.63          | 117.32              |
| C7 C6 C5     | 125.24          | 124.98              |
| C1 C6 C5     | 119.08          | 117.64              |
| C14 C2 C1    | 115.63          | 116.32              |
| C14 C2 C3    | 125.24          | 124.55              |
| C1 C2 C3     | 119.09          | 119.08              |
| O1 C1 C6     | 120.65          | 120.06              |
| O1 C1 C2     | 120.65          | 120.76              |
| C6 C1 C2     | 118.69          | 119.18              |
| C3 C4 C5     | 110.48          | 110.38              |
| C3 C4 H4A    | 109.81          | 109.60              |
| C5 C4 H4A    | 109.80          | 109.60              |
| C3 C4 H4B    | 109.88          | 109.60              |
| C5 C4 H4B    | 109.88          | 109.60              |
| H4A C4 H4B   | 106.92          | 108.10              |
| C2 C3 C4     | 111.89          | 111.72              |
| C2 C3 H3A    | 109.76          | 109.30              |
| C4 C3 H3A    | 110.30          | 109.30              |
| C2 C3 H3B    | 109.99          | 109.30              |
| C4 C3 H3B    | 108.39          | 109.30              |
| H3A C3 H3B   | 106.35          | 107.90              |
| C9 C10 C11   | 121.45          | 120.80              |
| C9 C10 C11   | 119.27          | 119.81              |
| C11 C10 C11  | 119.28          | 119.40              |
| C12 C13 C8   | 120.65          | 120.20              |
| C12 C13 H13  | 119.19          | 119.90              |

|             |        |        |
|-------------|--------|--------|
| C8 C13 H13  | 120.11 | 119.90 |
| C9 C8 C13   | 118.17 | 118.20 |
| C9 C8 C7    | 117.42 | 118.57 |
| C13 C8 C7   | 124.38 | 123.20 |
| C6 C5 C4    | 111.88 | 111.21 |
| C6 C5 H5A   | 109.77 | 109.40 |
| C4 C5 H5A   | 110.30 | 109.40 |
| C6 C5 H5B   | 109.99 | 109.40 |
| C4 C5 H5B   | 108.39 | 109.40 |
| H5A C5 H5B  | 106.35 | 108.00 |
| C20 C19 C18 | 121.45 | 121.90 |
| C20 C19 C12 | 119.27 | 118.85 |
| C18 C19 C12 | 119.28 | 119.23 |
| C17 C16 C15 | 120.65 | 120.70 |
| C17 C16 H16 | 119.19 | 119.60 |
| C15 C16 H16 | 120.12 | 119.60 |
| C10 C11 C12 | 118.48 | 119.00 |
| C10 C11 H11 | 120.33 | 120.50 |
| C12 C11 H11 | 121.18 | 120.50 |
| C18 C17 C16 | 120.91 | 120.90 |
| C18 C17 H17 | 119.32 | 119.50 |
| C16 C17 H17 | 119.77 | 119.50 |
| C17 C18 C19 | 118.48 | 118.40 |
| C17 C18 H18 | 121.18 | 120.80 |
| C19 C18 H18 | 120.33 | 120.80 |
| C11 C12 C13 | 120.91 | 120.80 |
| C11 C12 H12 | 119.32 | 119.60 |
| C13 C12 H12 | 119.77 | 119.60 |

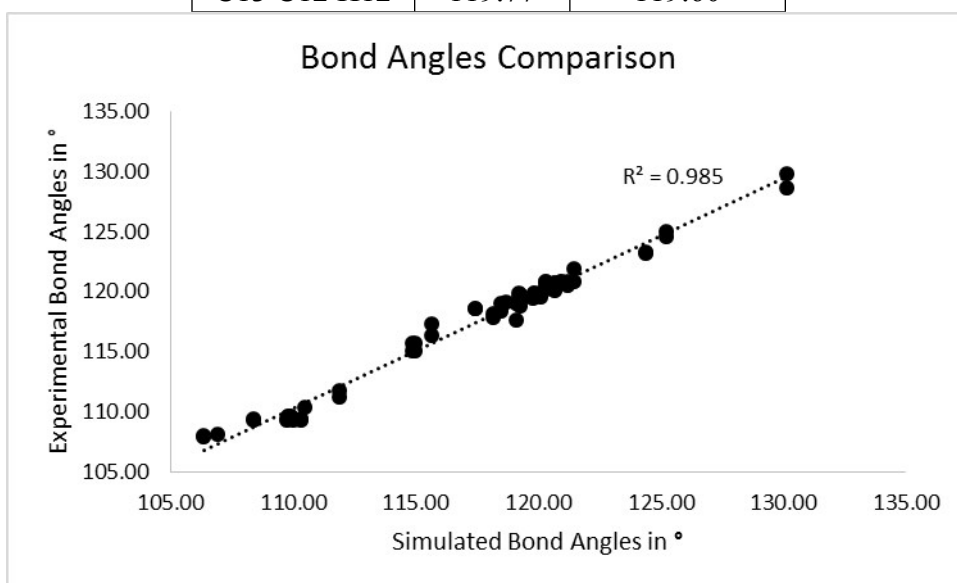

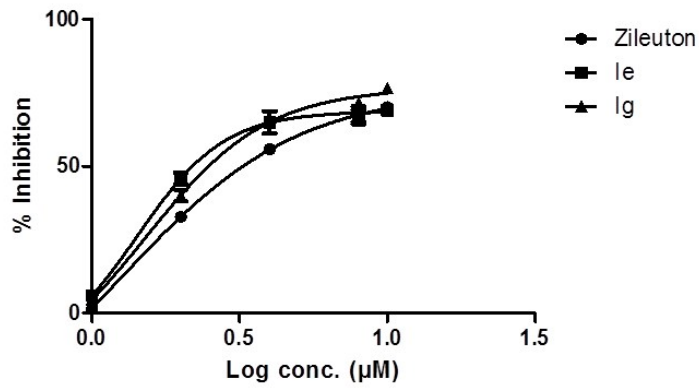

Fig 1. Dose response curve for **le**, **lg** and **Zileuton** against enzyme 5-LOX.

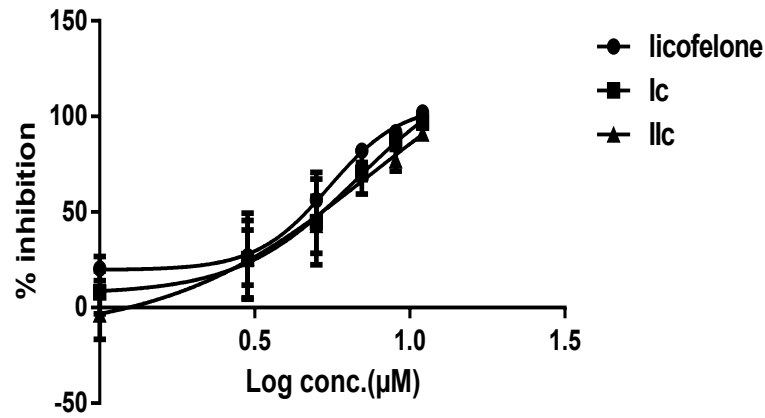

Fig 2. Dose response curve for **lc**, **llc** and **Licofelone** against enzyme COX2/mPGES1.
